# Supplementary material for: Self-management interventions for work participation in patients with musculoskeletal disorders: a scoping review
Source: Research Square preprint supplement (doi:10.21203/rs.3.rs-8301634/v1), 2025-12-15
Supplement: Supplementary file 1 [file dbe2e8fac694192db30739cc.pdf]

Self-management interventions for work participation in patients with musculoskeletal disorders:  
a scoping review

**Supplementary material**

|                                                                                                                          |    |
|--------------------------------------------------------------------------------------------------------------------------|----|
| Appendix 1. Bibliographic search strategies .....                                                                        | 2  |
| Appendix 2. Grey literature search strategies .....                                                                      | 17 |
| Appendix 3. List of websites consulted (between June and August 2025) .....                                              | 19 |
| Appendix 4. Classification of study type based on the constructs evaluated .....                                         | 20 |
| Appendix 5. Characteristics of the included studies (n=31) .....                                                         | 22 |
| Appendix 6. General constructs assessed in each outcome evaluation study (n=23) .....                                    | 32 |
| Appendix 7. Detailed impact evaluation methods of self-management interventions by type of<br>study (n=31 studies) ..... | 33 |

## Appendix 1. Bibliographic search strategies

| Database                          | Search strategy                                                                                                                                                                                                                                                                                                                                                                                                                                                                                                                                                                                                                                                                                                                                                                                                                                                                                                                                                                                                                                                                                                                                                                                                                                                                                                                                                                                                                                                                                                                                                                                                                                                                                                                                                                                                                                                                                                                                                                                                                                                                                                                                                                                                                                                                                                                                                                                                                                                                                                                                                                                                                                                                                                                                                                                                                                                                                                                                                                                          |
|-----------------------------------|----------------------------------------------------------------------------------------------------------------------------------------------------------------------------------------------------------------------------------------------------------------------------------------------------------------------------------------------------------------------------------------------------------------------------------------------------------------------------------------------------------------------------------------------------------------------------------------------------------------------------------------------------------------------------------------------------------------------------------------------------------------------------------------------------------------------------------------------------------------------------------------------------------------------------------------------------------------------------------------------------------------------------------------------------------------------------------------------------------------------------------------------------------------------------------------------------------------------------------------------------------------------------------------------------------------------------------------------------------------------------------------------------------------------------------------------------------------------------------------------------------------------------------------------------------------------------------------------------------------------------------------------------------------------------------------------------------------------------------------------------------------------------------------------------------------------------------------------------------------------------------------------------------------------------------------------------------------------------------------------------------------------------------------------------------------------------------------------------------------------------------------------------------------------------------------------------------------------------------------------------------------------------------------------------------------------------------------------------------------------------------------------------------------------------------------------------------------------------------------------------------------------------------------------------------------------------------------------------------------------------------------------------------------------------------------------------------------------------------------------------------------------------------------------------------------------------------------------------------------------------------------------------------------------------------------------------------------------------------------------------------|
| AMED (via<br>EBSCO)<br>2025-07-07 | <p>S1: TI ( "Self-management" OR "Self-care" OR Selfcare OR "self-help" OR "Self-treatment" ) OR AB ( "Self-management" OR "Self-care" OR Selfcare OR "self-help" OR "Self-treatment" ) OR SU ( "Self-management" OR "Self-care" OR Selfcare OR "self-help" OR "Self-treatment" )</p> <p>S2: TI ( Injur* OR musculoskeletal* OR "musculo-skeletal" OR MSK OR "chronic pain" OR LBP OR “low back pain” OR fracture* OR sprain* OR rupture* OR tear* OR osteoarthritis OR OA OR tendon* OR tenosyn* OR bursopath* OR bursitis OR epicondyl* OR "tennis elbow" OR "golfer's elbow" OR spondyl* OR whiplash OR impingement OR “frozen shoulder” OR capsul* OR “labr* tear” OR "shoulder instability" OR dislocation OR subluxation OR luxation OR “trigger finger” OR “lower back pain” OR lumbalgia OR “lumbar pain” OR stenosis OR spondyl* OR menisc* OR sciatica OR “carpal tunnel*” OR radiculopath* OR “cervicobrachial*” OR “back ache” OR lumbago OR ((neck or back or lumbar or shoulder* or arm* or forearm* or wrist* or hand* or finger* or joint* or hip or knee) N1 (tension or pain or ache* or injur* or disorder* or disease*)) ) OR AB ( Injur* OR musculoskeletal* OR "musculo-skeletal" OR MSK OR "chronic pain" OR LBP OR “low back pain” OR fracture* OR sprain* OR rupture* OR tear* OR osteoarthritis OR OA OR tendon* OR tenosyn* OR bursopath* OR bursitis OR epicondyl* OR "tennis elbow" OR "golfer's elbow" OR spondyl* OR whiplash OR impingement OR “frozen shoulder” OR capsul* OR “labr* tear” OR "shoulder instability" OR dislocation OR subluxation OR luxation OR “trigger finger” OR “lower back pain” OR lumbalgia OR “lumbar pain” OR stenosis OR spondyl* OR menisc* OR sciatica OR “carpal tunnel*” OR radiculopath* OR “cervicobrachial*” OR “back ache” OR lumbago OR ((neck or back or lumbar or shoulder* or arm* or forearm* or wrist* or hand* or finger* or joint* or hip or knee) N1 (tension or pain or ache* or injur* or disorder* or disease*)) ) OR SU ( Injur* OR musculoskeletal* OR "musculo-skeletal" OR MSK OR "chronic pain" OR LBP OR “low back pain” OR fracture* OR sprain* OR rupture* OR tear* OR osteoarthritis OR OA OR tendon* OR tenosyn* OR bursopath* OR bursitis OR epicondyl* OR "tennis elbow" OR "golfer's elbow" OR spondyl* OR whiplash OR impingement OR “frozen shoulder” OR capsul* OR “labr* tear” OR "shoulder instability" OR dislocation OR subluxation OR luxation OR “trigger finger” OR “lower back pain” OR lumbalgia OR “lumbar pain” OR stenosis OR spondyl* OR menisc* OR sciatica OR “carpal tunnel*” OR radiculopath* OR “cervicobrachial*” OR “back ache” OR lumbago OR ((neck or back or lumbar or shoulder* or arm* or forearm* or wrist* or hand* or finger* or joint* or hip or knee) N1 (tension or pain or ache* or injur* or disorder* or disease*)) )</p> <p>S3: TI ( occupation* OR absenteeism OR presenteeism OR RTW OR "sick* leave*" OR “sick* absence*” OR “medical leave*” OR workplace OR</p> |

Self-management interventions for work participation in patients with musculoskeletal disorders:  
a scoping review

|                                                            |                                                                                                                                                                                                                                                                                                                                                                                                                                                                                                                                                                                                                                                                                                                                                                                                                                                                                                                                                                                                                                                                                                                                                                                                                                                                                                                                                                                                                                                                                                                                                                                                                                                                                                |
|------------------------------------------------------------|------------------------------------------------------------------------------------------------------------------------------------------------------------------------------------------------------------------------------------------------------------------------------------------------------------------------------------------------------------------------------------------------------------------------------------------------------------------------------------------------------------------------------------------------------------------------------------------------------------------------------------------------------------------------------------------------------------------------------------------------------------------------------------------------------------------------------------------------------------------------------------------------------------------------------------------------------------------------------------------------------------------------------------------------------------------------------------------------------------------------------------------------------------------------------------------------------------------------------------------------------------------------------------------------------------------------------------------------------------------------------------------------------------------------------------------------------------------------------------------------------------------------------------------------------------------------------------------------------------------------------------------------------------------------------------------------|
|                                                            | <p>employment OR “return to work” OR “work performance” OR “work ability” OR “stay at work” OR “remain at work” OR “work resumption” OR "work* outcome*" OR “work reintegration” OR worker OR employee OR (occupational N1 (health OR risk*)) OR “work* disabilit*” OR “work absence*” OR “sick listed” OR “sick day*” ) OR AB ( occupation* OR absenteeism OR presenteeism OR RTW OR "sick* leave*" OR “sick* absence*” OR “medical leave*” OR workplace OR employment OR “return to work” OR “work performance” OR “work ability” OR “stay at work” OR “remain at work” OR “work resumption” OR "work* outcome*" OR “work reintegration” OR worker OR employee OR (occupational N1 (health OR risk*)) OR “work* disabilit*” OR “work absence*” OR “sick listed” OR “sick day*” ) OR SU ( occupation* OR absenteeism OR presenteeism OR RTW OR "sick* leave*" OR “sick* absence*” OR “medical leave*” OR workplace OR employment OR “return to work” OR “work performance” OR “work ability” OR “stay at work” OR “remain at work” OR “work resumption” OR "work* outcome*" OR “work reintegration” OR worker OR employee OR (occupational N1 (health OR risk*)) OR “work* disabilit*” OR “work absence*” OR “sick listed” OR “sick day*” )</p> <p>S4: S1 and S2 and S3 = 100 results</p>                                                                                                                                                                                                                                                                                                                                                                                                     |
| <p>Academic Search Complete (via EBSCO)<br/>2025-07-07</p> | <p>S1: TI ( "Self-management" OR "Self-care" OR Selfcare OR "self-help" OR "Self-treatment" ) OR AB ( "Self-management" OR "Self-care" OR Selfcare OR "self-help" OR "Self-treatment" ) OR SU ( "Self-management" OR "Self-care" OR Selfcare OR "self-help" OR "Self-treatment" )</p> <p>S2: (DE "Self-Management (Psychology)")</p> <p>S3: TI ( Injur* OR musculoskeletal* OR "musculo-skeletal" OR MSK OR "chronic pain" OR LBP OR “low back pain” OR fracture* OR sprain* OR rupture* OR tear* OR osteoarthritis OR OA OR tendon* OR tenosyn* OR bursopath* OR bursitis OR epicondyl* OR "tennis elbow" OR "golfer's elbow" OR spondyl* OR whiplash OR impingement OR “frozen shoulder” OR capsul* OR “labr* tear” OR "shoulder instability" OR dislocation OR subluxation OR luxation OR “trigger finger” OR “lower back pain” OR lumbalgia OR “lumbar pain” OR stenosis OR spondyl* OR menisc* OR sciatica OR “carpal tunnel*” OR radiculopath* OR “cervicobrachial*” OR “back ache” OR lumbago OR ((neck or back or lumbar or shoulder* or arm* or forearm* or wrist* or hand* or finger* or joint* or hip or knee) N1 (tension or pain or ache* or injur* or disorder* or disease*)) ) OR AB ( Injur* OR musculoskeletal* OR "musculo-skeletal" OR MSK OR "chronic pain" OR LBP OR “low back pain” OR fracture* OR sprain* OR rupture* OR tear* OR osteoarthritis OR OA OR tendon* OR tenosyn* OR bursopath* OR bursitis OR epicondyl* OR "tennis elbow" OR "golfer's elbow" OR spondyl* OR whiplash OR impingement OR “frozen shoulder” OR capsul* OR “labr* tear” OR "shoulder instability" OR dislocation OR subluxation OR luxation OR “trigger finger” OR “lower back pain” OR</p> |

Self-management interventions for work participation in patients with musculoskeletal disorders:  
a scoping review

|  |                                                                                                                                                                                                                                                                                                                                                                                                                                                                                                                                                                                                                                                                                                                                                                                                                                                                                                                                                                                                                                                                                                                                                                                                                                                                                                                                                                                                                                                                                                                                                                                                                                                                                                                                                                                                                                                                                                                                                                                                                                                                                                                                                                                                                                                                                                                                                                                                                                                                                                                                                                                                                                                                                                                                                                                                                                                                                                                                                                                                                                                                                                                     |
|--|---------------------------------------------------------------------------------------------------------------------------------------------------------------------------------------------------------------------------------------------------------------------------------------------------------------------------------------------------------------------------------------------------------------------------------------------------------------------------------------------------------------------------------------------------------------------------------------------------------------------------------------------------------------------------------------------------------------------------------------------------------------------------------------------------------------------------------------------------------------------------------------------------------------------------------------------------------------------------------------------------------------------------------------------------------------------------------------------------------------------------------------------------------------------------------------------------------------------------------------------------------------------------------------------------------------------------------------------------------------------------------------------------------------------------------------------------------------------------------------------------------------------------------------------------------------------------------------------------------------------------------------------------------------------------------------------------------------------------------------------------------------------------------------------------------------------------------------------------------------------------------------------------------------------------------------------------------------------------------------------------------------------------------------------------------------------------------------------------------------------------------------------------------------------------------------------------------------------------------------------------------------------------------------------------------------------------------------------------------------------------------------------------------------------------------------------------------------------------------------------------------------------------------------------------------------------------------------------------------------------------------------------------------------------------------------------------------------------------------------------------------------------------------------------------------------------------------------------------------------------------------------------------------------------------------------------------------------------------------------------------------------------------------------------------------------------------------------------------------------------|
|  | <p>lumbalgia OR “lumbar pain” OR stenosis OR spondyl* OR menisc* OR sciatica OR “carpal tunnel*” OR radiculopath* OR “cervicobrachial*” OR “back ache” OR lumbago OR ((neck or back or lumbar or shoulder* or arm* or forearm* or wrist* or hand* or finger* or joint* or hip or knee) N1 (tension or pain or ache* or injur* or disorder* or disease*)) ) OR SU ( Injur* OR musculoskeletal* OR "musculo-skeletal" OR MSK OR "chronic pain" OR LBP OR “low back pain” OR fracture* OR sprain* OR rupture* OR tear* OR osteoarthritis OR OA OR tendon* OR tenosyn* OR bursopath* OR bursitis OR epicondyl* OR "tennis elbow" OR "golfer's elbow" OR spondyl* OR whiplash OR impingement OR “frozen shoulder” OR capsul* OR “labr* tear” OR "shoulder instability" OR dislocation OR subluxation OR luxation OR “trigger finger” OR “lower back pain” OR lumbalgia OR “lumbar pain” OR stenosis OR spondyl* OR menisc* OR sciatica OR “carpal tunnel*” OR radiculopath* OR “cervicobrachial*” OR “back ache” OR lumbago OR ((neck or back or lumbar or shoulder* or arm* or forearm* or wrist* or hand* or finger* or joint* or hip or knee) N1 (tension or pain or ache* or injur* or disorder* or disease*)) )</p> <p>S4: (DE "Overuse injuries" OR DE "Sports injuries" OR DE "Work-related injuries" OR DE "Wounds &amp; injuries" OR DE "Neck injuries" OR DE "Musculoskeletal system injuries" OR DE "Muscle injuries" OR DE "Ligament injuries" OR DE "Knee injuries" OR DE "Joint injuries" OR DE "Injuries of the anatomical extremities" OR DE "Hip joint injuries" OR DE "Heel injuries" OR DE "Hand injuries" OR DE "Forearm injuries" OR DE "Finger joint injuries" OR DE "Finger injuries" OR DE "Elbow injuries" OR DE "Back injuries" OR DE "Arm injuries" OR DE "Ankle injuries" OR DE "Wrist injuries" OR DE "Skeletal muscle injuries" OR DE "Shoulder joint injuries" OR DE "Rotator cuff injuries" OR DE "Musculoskeletal system diseases" OR DE "Musculoskeletal pain" OR DE "Peripheral nerve injuries" OR DE "Peripheral neuropathy")</p> <p>S5: TI ( occupation* OR absenteeism OR presenteeism OR RTW OR "sick* leave*" OR “sick* absence*” OR “medical leave*” OR workplace OR employment OR “return to work” OR “work performance” OR “work ability” OR “stay at work” OR “remain at work” OR “work resumption” OR "work* outcome*" OR “work reintegration” OR worker OR employee OR (occupational N1 (health OR risk*)) OR “work* disabilit*” OR “work absence*” OR “sick listed” OR “sick day*” ) OR AB ( occupation* OR absenteeism OR presenteeism OR RTW OR "sick* leave*" OR “sick* absence*” OR “medical leave*” OR workplace OR employment OR “return to work” OR “work performance” OR “work ability” OR “stay at work” OR “remain at work” OR “work resumption” OR "work* outcome*" OR “work reintegration” OR worker OR employee OR (occupational N1 (health OR risk*)) OR “work* disabilit*” OR “work absence*” OR “sick listed” OR “sick day*” ) OR SU ( occupation* OR absenteeism OR presenteeism OR RTW OR "sick* leave*" OR “sick* absence*” OR “medical leave*” OR</p> |
|--|---------------------------------------------------------------------------------------------------------------------------------------------------------------------------------------------------------------------------------------------------------------------------------------------------------------------------------------------------------------------------------------------------------------------------------------------------------------------------------------------------------------------------------------------------------------------------------------------------------------------------------------------------------------------------------------------------------------------------------------------------------------------------------------------------------------------------------------------------------------------------------------------------------------------------------------------------------------------------------------------------------------------------------------------------------------------------------------------------------------------------------------------------------------------------------------------------------------------------------------------------------------------------------------------------------------------------------------------------------------------------------------------------------------------------------------------------------------------------------------------------------------------------------------------------------------------------------------------------------------------------------------------------------------------------------------------------------------------------------------------------------------------------------------------------------------------------------------------------------------------------------------------------------------------------------------------------------------------------------------------------------------------------------------------------------------------------------------------------------------------------------------------------------------------------------------------------------------------------------------------------------------------------------------------------------------------------------------------------------------------------------------------------------------------------------------------------------------------------------------------------------------------------------------------------------------------------------------------------------------------------------------------------------------------------------------------------------------------------------------------------------------------------------------------------------------------------------------------------------------------------------------------------------------------------------------------------------------------------------------------------------------------------------------------------------------------------------------------------------------------|

Self-management interventions for work participation in patients with musculoskeletal disorders:  
a scoping review

|                                                    |                                                                                                                                                                                                                                                                                                                                                                                                                                                                                                                                                                                                                                                                                                                                                                                                                                                                                                                                                                                                                                                                                                                                                                                                                                                                                                                                                                                                                                                                                                                                                                                                                                                                                                                                                                                                                                                                                                                       |
|----------------------------------------------------|-----------------------------------------------------------------------------------------------------------------------------------------------------------------------------------------------------------------------------------------------------------------------------------------------------------------------------------------------------------------------------------------------------------------------------------------------------------------------------------------------------------------------------------------------------------------------------------------------------------------------------------------------------------------------------------------------------------------------------------------------------------------------------------------------------------------------------------------------------------------------------------------------------------------------------------------------------------------------------------------------------------------------------------------------------------------------------------------------------------------------------------------------------------------------------------------------------------------------------------------------------------------------------------------------------------------------------------------------------------------------------------------------------------------------------------------------------------------------------------------------------------------------------------------------------------------------------------------------------------------------------------------------------------------------------------------------------------------------------------------------------------------------------------------------------------------------------------------------------------------------------------------------------------------------|
|                                                    | <p>workplace OR employment OR “return to work” OR “work performance” OR “work ability” OR “stay at work” OR “remain at work” OR “work resumption” OR "work* outcome*" OR “work reintegration” OR worker OR employee OR (occupational N1 (health OR risk*)) OR “work* disabilit*” OR “work absence*” OR “sick listed” OR “sick day*” )</p> <p>S6: (DE "Employee health promotion" OR DE "Quality of work life" OR DE "Insurance" OR DE "Unemployment" OR DE "Job absenteeism" OR DE "Sick leave" OR DE "Work")</p> <p>S7: S1 or S2</p> <p>S8: S3 or S4</p> <p>S9: S5 or S6</p> <p>S10: S7 and S8 and S9 = 530 results</p>                                                                                                                                                                                                                                                                                                                                                                                                                                                                                                                                                                                                                                                                                                                                                                                                                                                                                                                                                                                                                                                                                                                                                                                                                                                                                              |
| <p>APA PsycInfo<br/>(via EBSCO)<br/>2025-07-07</p> | <p>S1: TI ( "Self-management" OR "Self-care" OR Selfcare OR "self-help" OR "Self-treatment" ) OR AB ( "Self-management" OR "Self-care" OR Selfcare OR "self-help" OR "Self-treatment" ) OR SU ( "Self-management" OR "Self-care" OR Selfcare OR "self-help" OR "Self-treatment" )</p> <p>S2: (DE "Self-Management") OR (DE "Self-Care")</p> <p>S3: TI ( Injur* OR musculoskeletal* OR "musculo-skeletal" OR MSK OR "chronic pain" OR LBP OR “low back pain” OR fracture* OR sprain* OR rupture* OR tear* OR osteoarthritis OR OA OR tendon* OR tenosyn* OR bursopath* OR bursitis OR epicondyl* OR "tennis elbow" OR "golfer's elbow" OR spondyl* OR whiplash OR impingement OR “frozen shoulder” OR capsul* OR “labr* tear” OR "shoulder instability" OR dislocation OR subluxation OR luxation OR “trigger finger” OR “lower back pain” OR lumbalgia OR “lumbar pain” OR stenosis OR spondyl* OR menisc* OR sciatica OR “carpal tunnel*” OR radiculopath* OR “cervicobrachial*” OR “back ache” OR lumbago OR ((neck or back or lumbar or shoulder* or arm* or forearm* or wrist* or hand* or finger* or joint* or hip or knee) N1 (tension or pain or ache* or injur* or disorder* or disease*)) ) OR AB ( Injur* OR musculoskeletal* OR "musculo-skeletal" OR MSK OR "chronic pain" OR LBP OR “low back pain” OR fracture* OR sprain* OR rupture* OR tear* OR osteoarthritis OR OA OR tendon* OR tenosyn* OR bursopath* OR bursitis OR epicondyl* OR "tennis elbow" OR "golfer's elbow" OR spondyl* OR whiplash OR impingement OR “frozen shoulder” OR capsul* OR “labr* tear” OR "shoulder instability" OR dislocation OR subluxation OR luxation OR “trigger finger” OR “lower back pain” OR lumbalgia OR “lumbar pain” OR stenosis OR spondyl* OR menisc* OR sciatica OR “carpal tunnel*” OR radiculopath* OR “cervicobrachial*” OR “back ache” OR lumbago OR ((neck or back or lumbar or shoulder* or arm*</p> |

Self-management interventions for work participation in patients with musculoskeletal disorders:  
a scoping review

|  |                                                                                                                                                                                                                                                                                                                                                                                                                                                                                                                                                                                                                                                                                                                                                                                                                                                                                                                                                                                                                                                                                                                                                                                                                                                                                                                                                                                                                                                                                                                                                                                                                                                                                                                                                                                                                                                                                                                                                                                                                                                                                                                                                                                                                                                                                                                                                                                                                                                                                                                                                                                                                                                                                                                                                                                                                                       |
|--|---------------------------------------------------------------------------------------------------------------------------------------------------------------------------------------------------------------------------------------------------------------------------------------------------------------------------------------------------------------------------------------------------------------------------------------------------------------------------------------------------------------------------------------------------------------------------------------------------------------------------------------------------------------------------------------------------------------------------------------------------------------------------------------------------------------------------------------------------------------------------------------------------------------------------------------------------------------------------------------------------------------------------------------------------------------------------------------------------------------------------------------------------------------------------------------------------------------------------------------------------------------------------------------------------------------------------------------------------------------------------------------------------------------------------------------------------------------------------------------------------------------------------------------------------------------------------------------------------------------------------------------------------------------------------------------------------------------------------------------------------------------------------------------------------------------------------------------------------------------------------------------------------------------------------------------------------------------------------------------------------------------------------------------------------------------------------------------------------------------------------------------------------------------------------------------------------------------------------------------------------------------------------------------------------------------------------------------------------------------------------------------------------------------------------------------------------------------------------------------------------------------------------------------------------------------------------------------------------------------------------------------------------------------------------------------------------------------------------------------------------------------------------------------------------------------------------------------|
|  | <p>or forearm* or wrist* or hand* or finger* or joint* or hip or knee) N1 (tension or pain or ache* or injur* or disorder* or disease*)) ) OR SU ( Injur* OR musculoskeletal* OR "musculo-skeletal" OR MSK OR "chronic pain" OR LBP OR "low back pain" OR fracture* OR sprain* OR rupture* OR tear* OR osteoarthritis OR OA OR tendon* OR tenosyn* OR bursopath* OR bursitis OR epicondyl* OR "tennis elbow" OR "golfer's elbow" OR spondyl* OR whiplash OR impingement OR "frozen shoulder" OR capsul* OR "labr* tear" OR "shoulder instability" OR dislocation OR subluxation OR luxation OR "trigger finger" OR "lower back pain" OR lumbalgia OR "lumbar pain" OR stenosis OR spondyl* OR menisc* OR sciatica OR "carpal tunnel*" OR radiculopath* OR "cervicobrachial*" OR "back ache" OR lumbago OR ((neck or back or lumbar or shoulder* or arm* or forearm* or wrist* or hand* or finger* or joint* or hip or knee) N1 (tension or pain or ache* or injur* or disorder* or disease*)) )</p> <p>S4: DE "Musculoskeletal Disorders" OR DE "Injuries" OR DE "Athletic Injuries" DE "Peripheral Neuropathy"</p> <p>S5: TI ( occupation* OR absenteeism OR presenteeism OR RTW OR "sick* leave*" OR "sick* absence*" OR "medical leave*" OR workplace OR employment OR "return to work" OR "work performance" OR "work ability" OR "stay at work" OR "remain at work" OR "work resumption" OR "work* outcome*" OR "work reintegration" OR worker OR employee OR (occupational N1 (health OR risk*)) OR "work* disabilit*" OR "work absence*" OR "sick listed" OR "sick day*" ) OR AB ( occupation* OR absenteeism OR presenteeism OR RTW OR "sick* leave*" OR "sick* absence*" OR "medical leave*" OR workplace OR employment OR "return to work" OR "work performance" OR "work ability" OR "stay at work" OR "remain at work" OR "work resumption" OR "work* outcome*" OR "work reintegration" OR worker OR employee OR (occupational N1 (health OR risk*)) OR "work* disabilit*" OR "work absence*" OR "sick listed" OR "sick day*" ) OR SU ( occupation* OR absenteeism OR presenteeism OR RTW OR "sick* leave*" OR "sick* absence*" OR "medical leave*" OR workplace OR employment OR "return to work" OR "work performance" OR "work ability" OR "stay at work" OR "remain at work" OR "work resumption" OR "work* outcome*" OR "work reintegration" OR worker OR employee OR (occupational N1 (health OR risk*)) OR "work* disabilit*" OR "work absence*" OR "sick listed" OR "sick day*" )</p> <p>S6: DE "Occupations" OR DE "Employment Status" OR DE "Occupational Health" OR DE "Insurance" OR DE "Workers' Compensation Insurance" OR DE "Employee Health Insurance" OR DE "Unemployment" OR DE "Employee Absenteeism" OR DE "Employee Leave Benefits" OR DE "Reemployment" OR DE "Employment"</p> <p>S7: S1 or S2</p> |
|--|---------------------------------------------------------------------------------------------------------------------------------------------------------------------------------------------------------------------------------------------------------------------------------------------------------------------------------------------------------------------------------------------------------------------------------------------------------------------------------------------------------------------------------------------------------------------------------------------------------------------------------------------------------------------------------------------------------------------------------------------------------------------------------------------------------------------------------------------------------------------------------------------------------------------------------------------------------------------------------------------------------------------------------------------------------------------------------------------------------------------------------------------------------------------------------------------------------------------------------------------------------------------------------------------------------------------------------------------------------------------------------------------------------------------------------------------------------------------------------------------------------------------------------------------------------------------------------------------------------------------------------------------------------------------------------------------------------------------------------------------------------------------------------------------------------------------------------------------------------------------------------------------------------------------------------------------------------------------------------------------------------------------------------------------------------------------------------------------------------------------------------------------------------------------------------------------------------------------------------------------------------------------------------------------------------------------------------------------------------------------------------------------------------------------------------------------------------------------------------------------------------------------------------------------------------------------------------------------------------------------------------------------------------------------------------------------------------------------------------------------------------------------------------------------------------------------------------------|

Self-management interventions for work participation in patients with musculoskeletal disorders:  
a scoping review

|                                          |                                                                                                                                                                                                                                                                                                                                                                                                                                                                                                                                                                                                                                                                                                                                                                                                                                                                                                                                                                                                                                                                                                                                                                                                                                                                                                                                                                                                                                                                                                                                                                                                                                                                                                                                                                                                                                                                                                                                                                                                                                                                                                                                                                                                                                                                                                                                                                                                                                                                                                                                                                                                                                                                                                    |
|------------------------------------------|----------------------------------------------------------------------------------------------------------------------------------------------------------------------------------------------------------------------------------------------------------------------------------------------------------------------------------------------------------------------------------------------------------------------------------------------------------------------------------------------------------------------------------------------------------------------------------------------------------------------------------------------------------------------------------------------------------------------------------------------------------------------------------------------------------------------------------------------------------------------------------------------------------------------------------------------------------------------------------------------------------------------------------------------------------------------------------------------------------------------------------------------------------------------------------------------------------------------------------------------------------------------------------------------------------------------------------------------------------------------------------------------------------------------------------------------------------------------------------------------------------------------------------------------------------------------------------------------------------------------------------------------------------------------------------------------------------------------------------------------------------------------------------------------------------------------------------------------------------------------------------------------------------------------------------------------------------------------------------------------------------------------------------------------------------------------------------------------------------------------------------------------------------------------------------------------------------------------------------------------------------------------------------------------------------------------------------------------------------------------------------------------------------------------------------------------------------------------------------------------------------------------------------------------------------------------------------------------------------------------------------------------------------------------------------------------------|
|                                          | <p>S8: S3 or S4</p> <p>S9: S5 or S6</p> <p>S10: S7 and S8 and S9 = 333 results</p>                                                                                                                                                                                                                                                                                                                                                                                                                                                                                                                                                                                                                                                                                                                                                                                                                                                                                                                                                                                                                                                                                                                                                                                                                                                                                                                                                                                                                                                                                                                                                                                                                                                                                                                                                                                                                                                                                                                                                                                                                                                                                                                                                                                                                                                                                                                                                                                                                                                                                                                                                                                                                 |
| <p>CINAHL (via EBSCO)<br/>2025-07-07</p> | <p>S1: TI ( "Self-management" OR "Self-care" OR Selfcare OR "self-help" OR "Self-treatment" ) OR AB ( "Self-management" OR "Self-care" OR Selfcare OR "self-help" OR "Self-treatment" ) OR SU ( "Self-management" OR "Self-care" OR Selfcare OR "self-help" OR "Self-treatment" )</p> <p>S2: (MH "Self-Management") OR (MH "Self-Care")</p> <p>S3: TI ( Injur* OR musculoskeletal* OR "musculo-skeletal" OR MSK OR "chronic pain" OR LBP OR “low back pain” OR fracture* OR sprain* OR rupture* OR tear* OR osteoarthritis OR OA OR tendon* OR tenosyn* OR bursopath* OR bursitis OR epicondyl* OR "tennis elbow" OR "golfer's elbow" OR spondyl* OR whiplash OR impingement OR “frozen shoulder” OR capsul* OR “labr* tear” OR "shoulder instability" OR dislocation OR subluxation OR luxation OR “trigger finger” OR “lower back pain” OR lumbalgia OR “lumbar pain” OR stenosis OR spondyl* OR menisc* OR sciatica OR “carpal tunnel*” OR radiculopath* OR “cervicobrachial*” OR “back ache” OR lumbago OR ((neck or back or lumbar or shoulder* or arm* or forearm* or wrist* or hand* or finger* or joint* or hip or knee) N1 (tension or pain or ache* or injur* or disorder* or disease*)) ) OR AB ( Injur* OR musculoskeletal* OR "musculo-skeletal" OR MSK OR "chronic pain" OR LBP OR “low back pain” OR fracture* OR sprain* OR rupture* OR tear* OR osteoarthritis OR OA OR tendon* OR tenosyn* OR bursopath* OR bursitis OR epicondyl* OR "tennis elbow" OR "golfer's elbow" OR spondyl* OR whiplash OR impingement OR “frozen shoulder” OR capsul* OR “labr* tear” OR "shoulder instability" OR dislocation OR subluxation OR luxation OR “trigger finger” OR “lower back pain” OR lumbalgia OR “lumbar pain” OR stenosis OR spondyl* OR menisc* OR sciatica OR “carpal tunnel*” OR radiculopath* OR “cervicobrachial*” OR “back ache” OR lumbago OR ((neck or back or lumbar or shoulder* or arm* or forearm* or wrist* or hand* or finger* or joint* or hip or knee) N1 (tension or pain or ache* or injur* or disorder* or disease*)) ) OR SU ( Injur* OR musculoskeletal* OR "musculo-skeletal" OR MSK OR "chronic pain" OR LBP OR “low back pain” OR fracture* OR sprain* OR rupture* OR tear* OR osteoarthritis OR OA OR tendon* OR tenosyn* OR bursopath* OR bursitis OR epicondyl* OR "tennis elbow" OR "golfer's elbow" OR spondyl* OR whiplash OR impingement OR “frozen shoulder” OR capsul* OR “labr* tear” OR "shoulder instability" OR dislocation OR subluxation OR luxation OR “trigger finger” OR “lower back pain” OR lumbalgia OR “lumbar pain” OR stenosis OR spondyl* OR menisc* OR sciatica OR “carpal tunnel*” OR radiculopath* OR “cervicobrachial*” OR</p> |

Self-management interventions for work participation in patients with musculoskeletal disorders:  
a scoping review

|  |                                                                                                                                                                                                                                                                                                                                                                                                                                                                                                                                                                                                                                                                                                                                                                                                                                                                                                                                                                                                                                                                                                                                                                                                                                                                                                                                                                                                                                                                                                                                                                                                                                                                                                                                                                                                                                                                                                                                                                                                                                                                                                                                                                                                                                                                                                                                                                                                                                                                                                                                                                                                                                                                                                                                     |
|--|-------------------------------------------------------------------------------------------------------------------------------------------------------------------------------------------------------------------------------------------------------------------------------------------------------------------------------------------------------------------------------------------------------------------------------------------------------------------------------------------------------------------------------------------------------------------------------------------------------------------------------------------------------------------------------------------------------------------------------------------------------------------------------------------------------------------------------------------------------------------------------------------------------------------------------------------------------------------------------------------------------------------------------------------------------------------------------------------------------------------------------------------------------------------------------------------------------------------------------------------------------------------------------------------------------------------------------------------------------------------------------------------------------------------------------------------------------------------------------------------------------------------------------------------------------------------------------------------------------------------------------------------------------------------------------------------------------------------------------------------------------------------------------------------------------------------------------------------------------------------------------------------------------------------------------------------------------------------------------------------------------------------------------------------------------------------------------------------------------------------------------------------------------------------------------------------------------------------------------------------------------------------------------------------------------------------------------------------------------------------------------------------------------------------------------------------------------------------------------------------------------------------------------------------------------------------------------------------------------------------------------------------------------------------------------------------------------------------------------------|
|  | <p>“back ache” OR lumbago OR ((neck or back or lumbar or shoulder* or arm* or forearm* or wrist* or hand* or finger* or joint* or hip or knee) N1 (tension or pain or ache* or injur* or disorder* or disease*)) )</p> <p>S4: (MH "Occupational-Related Injuries") OR (MH "Musculoskeletal Pain") OR (MH "Musculoskeletal Diseases") OR (MH "Occupational Diseases") OR MH (“Neck Injuries”) OR MH (“Sprains and Strains”) OR (MH “Arm Injuries”) OR (MH “Athletic Injuries”) OR (MH “Hand Injuries”) OR (MH "Wounds and Injuries") OR (MH "Tendon Injuries") OR (MH "Shoulder Injuries") OR (MH "Meniscal Injuries") OR (MH "Ligament Injuries") OR (MH "Leg Injuries") OR (MH "Knee Injuries") OR (MH "Hip Injuries") OR (MH "Forearm Injuries") OR (MH "Foot Injuries") OR (MH "Finger Injuries") OR (MH "Elbow Injuries") OR (MH "Back Injuries") OR (MH "Arm Injuries") OR (MH "Ankle Injuries") OR (MH "Soft Tissue Injuries") OR (MH "Rotator Cuff Injuries") OR (MH "Peripheral Nervous System Diseases")</p> <p>S5: TI ( occupation* OR absenteeism OR presenteeism OR RTW OR "sick* leave*" OR “sick* absence*” OR “medical leave*” OR workplace OR employment OR “return to work” OR “work performance” OR “work ability” OR “stay at work” OR “remain at work” OR “work resumption” OR "work* outcome*" OR “work reintegration” OR worker OR employee OR (occupational N1 (health OR risk*)) OR “work* disabilit*” OR “work absence*” OR “sick listed” OR “sick day*” ) OR AB ( occupation* OR absenteeism OR presenteeism OR RTW OR "sick* leave*" OR “sick* absence*” OR “medical leave*” OR workplace OR employment OR “return to work” OR “work performance” OR “work ability” OR “stay at work” OR “remain at work” OR “work resumption” OR "work* outcome*" OR “work reintegration” OR worker OR employee OR (occupational N1 (health OR risk*)) OR “work* disabilit*” OR “work absence*” OR “sick listed” OR “sick day*” ) OR SU ( occupation* OR absenteeism OR presenteeism OR RTW OR "sick* leave*" OR “sick* absence*” OR “medical leave*” OR workplace OR employment OR “return to work” OR “work performance” OR “work ability” OR “stay at work” OR “remain at work” OR “work resumption” OR "work* outcome*" OR “work reintegration” OR worker OR employee OR (occupational N1 (health OR risk*)) OR “work* disabilit*” OR “work absence*” OR “sick listed” OR “sick day*” )</p> <p>S6: (MH "Occupations and Professions") OR (MH "Occupational Health") OR (MH "Insurance, Disability") OR (MH "Insurance, Unemployment") OR (MH "Absenteeism") OR (MH "Sick Leave") OR (MH "Job Re-Entry") OR (MH "Work") OR (MH "Employment") OR (MH "Insurance, Health")</p> <p>S7: S1 or S2</p> <p>S8: S3 or S4</p> |
|--|-------------------------------------------------------------------------------------------------------------------------------------------------------------------------------------------------------------------------------------------------------------------------------------------------------------------------------------------------------------------------------------------------------------------------------------------------------------------------------------------------------------------------------------------------------------------------------------------------------------------------------------------------------------------------------------------------------------------------------------------------------------------------------------------------------------------------------------------------------------------------------------------------------------------------------------------------------------------------------------------------------------------------------------------------------------------------------------------------------------------------------------------------------------------------------------------------------------------------------------------------------------------------------------------------------------------------------------------------------------------------------------------------------------------------------------------------------------------------------------------------------------------------------------------------------------------------------------------------------------------------------------------------------------------------------------------------------------------------------------------------------------------------------------------------------------------------------------------------------------------------------------------------------------------------------------------------------------------------------------------------------------------------------------------------------------------------------------------------------------------------------------------------------------------------------------------------------------------------------------------------------------------------------------------------------------------------------------------------------------------------------------------------------------------------------------------------------------------------------------------------------------------------------------------------------------------------------------------------------------------------------------------------------------------------------------------------------------------------------------|



Self-management interventions for work participation in patients with musculoskeletal disorders:  
a scoping review

|                                         |                                                                                                                                                                                                                                                                                                                                                                                                                                                                                                                                                                                                                                                                                                                                                                                                                                                                                                                                                                                                                                                                                                                                                                                                                                                                                                                                                                                                                                                                                                                                                                                                                                                                                                                                                                                                                                                                                                                                                                                                                                                                                                                                                                                                                                                                                                                                                                                                                                                                                                                                                                                                                    |
|-----------------------------------------|--------------------------------------------------------------------------------------------------------------------------------------------------------------------------------------------------------------------------------------------------------------------------------------------------------------------------------------------------------------------------------------------------------------------------------------------------------------------------------------------------------------------------------------------------------------------------------------------------------------------------------------------------------------------------------------------------------------------------------------------------------------------------------------------------------------------------------------------------------------------------------------------------------------------------------------------------------------------------------------------------------------------------------------------------------------------------------------------------------------------------------------------------------------------------------------------------------------------------------------------------------------------------------------------------------------------------------------------------------------------------------------------------------------------------------------------------------------------------------------------------------------------------------------------------------------------------------------------------------------------------------------------------------------------------------------------------------------------------------------------------------------------------------------------------------------------------------------------------------------------------------------------------------------------------------------------------------------------------------------------------------------------------------------------------------------------------------------------------------------------------------------------------------------------------------------------------------------------------------------------------------------------------------------------------------------------------------------------------------------------------------------------------------------------------------------------------------------------------------------------------------------------------------------------------------------------------------------------------------------------|
|                                         | <p>S9: S5 or S6</p> <p>S10: S7 and S8 and S9 = 960 results</p>                                                                                                                                                                                                                                                                                                                                                                                                                                                                                                                                                                                                                                                                                                                                                                                                                                                                                                                                                                                                                                                                                                                                                                                                                                                                                                                                                                                                                                                                                                                                                                                                                                                                                                                                                                                                                                                                                                                                                                                                                                                                                                                                                                                                                                                                                                                                                                                                                                                                                                                                                     |
| <p>Embase (via OVID)<br/>2025-07-07</p> | <ol style="list-style-type: none"> <li>1) 'self-management':ti,ab,kw OR 'self-care':ti,ab,kw OR selfcare:ti,ab,kw OR 'self-help':ti,ab,kw OR 'self-treatment':ti,ab,kw</li> <li>2) 'self care'/exp OR 'self management intervention'/exp</li> <li>3) injur*:ti,ab,kw OR musculoskeletal*:ti,ab,kw OR 'musculo-skeletal':ti,ab,kw OR msk:ti,ab,kw OR 'chronic pain':ti,ab,kw OR lbp:ti,ab,kw OR 'low back pain':ti,ab,kw OR fracture*:ti,ab,kw OR sprain*:ti,ab,kw OR rupture*:ti,ab,kw OR tear*:ti,ab,kw OR osteoarthritis:ti,ab,kw OR oa:ti,ab,kw OR tendon*:ti,ab,kw OR tenosyn*:ti,ab,kw OR bursopath*:ti,ab,kw OR bursitis:ti,ab,kw OR epicondyl*:ti,ab,kw OR 'tennis elbow':ti,ab,kw OR 'golfer* elbow':ti,ab,kw OR whiplash:ti,ab,kw OR impingement:ti,ab,kw OR 'frozen shoulder':ti,ab,kw OR capsul*:ti,ab,kw OR 'labr* tear':ti,ab,kw OR 'shoulder instability':ti,ab,kw OR dislocation:ti,ab,kw OR subluxation:ti,ab,kw OR luxation:ti,ab,kw OR 'trigger finger':ti,ab,kw OR 'lower back pain':ti,ab,kw OR lumbalgia:ti,ab,kw OR 'lumbar pain':ti,ab,kw OR stenosis:ti,ab,kw OR spondyl*:ti,ab,kw OR menisc*:ti,ab,kw OR sciatica:ti,ab,kw OR 'carpal tunnel':ti,ab,kw OR radiculopath*:ti,ab,kw OR 'cervicobrachial*:ti,ab,kw OR 'back ache':ti,ab,kw OR lumbago:ti,ab,kw OR (((neck OR back OR lumbar OR shoulder* OR arm* OR forearm* OR wrist* OR hand* OR finger* OR joint* OR hip OR knee) NEAR/1 (tension OR pain OR ache* OR injur* OR disorder* OR disease*)):ti,ab,kw)</li> <li>4) 'occupational accident'/exp OR 'musculoskeletal pain'/exp OR 'musculoskeletal disease'/exp OR 'occupational disease'/exp OR 'injury'/exp OR 'peripheral neuropathy'/exp OR 'musculoskeletal injury'/exp OR 'soft tissue injury'/exp</li> <li>5) occupation*:ti,ab,kw OR absenteeism:ti,ab,kw OR presenteeism:ti,ab,kw OR rtw:ti,ab,kw OR 'sick* leave*:ti,ab,kw OR 'sick* absence*:ti,ab,kw OR 'medical leave*:ti,ab,kw OR workplace:ti,ab,kw OR employment:ti,ab,kw OR 'return to work':ti,ab,kw OR 'work performance':ti,ab,kw OR 'work ability':ti,ab,kw OR 'stay at work':ti,ab,kw OR 'remain at work':ti,ab,kw OR 'work resumption':ti,ab,kw OR 'work* outcome*:ti,ab,kw OR 'work reintegration':ti,ab,kw OR worker:ti,ab,kw OR employee:ti,ab,kw OR ((occupational NEAR/1 (health OR risk*)):ti,ab,kw) OR 'work* disabilit*:ti,ab,kw OR 'work absence*:ti,ab,kw OR 'sick listed':ti,ab,kw OR 'sick day*:ti,ab,kw</li> <li>6) 'occupation and occupation related phenomena'/exp OR 'disability insurance'/exp OR 'health insurance'/exp OR 'unemployment insurance'/exp</li> <li>7) #1 OR #2</li> </ol> |

Self-management interventions for work participation in patients with musculoskeletal disorders:  
a scoping review

|                                               |                                                                                                                                                                                                                                                                                                                                                                                                                                                                                                                                                                                                                                                                                                                                                                                                                                                                                                                                                                                                                                                                                                                                                                                                                                                                                                                                                                                                                                                                                                                                                                                                                                                                                                                                                                                                                                                                                                                                                                                                                                                                                                                                                                                                                                                                                                                                                                                                                                                                                                                                                                                                                                                                                                                                                                                                                                                                                                                    |
|-----------------------------------------------|--------------------------------------------------------------------------------------------------------------------------------------------------------------------------------------------------------------------------------------------------------------------------------------------------------------------------------------------------------------------------------------------------------------------------------------------------------------------------------------------------------------------------------------------------------------------------------------------------------------------------------------------------------------------------------------------------------------------------------------------------------------------------------------------------------------------------------------------------------------------------------------------------------------------------------------------------------------------------------------------------------------------------------------------------------------------------------------------------------------------------------------------------------------------------------------------------------------------------------------------------------------------------------------------------------------------------------------------------------------------------------------------------------------------------------------------------------------------------------------------------------------------------------------------------------------------------------------------------------------------------------------------------------------------------------------------------------------------------------------------------------------------------------------------------------------------------------------------------------------------------------------------------------------------------------------------------------------------------------------------------------------------------------------------------------------------------------------------------------------------------------------------------------------------------------------------------------------------------------------------------------------------------------------------------------------------------------------------------------------------------------------------------------------------------------------------------------------------------------------------------------------------------------------------------------------------------------------------------------------------------------------------------------------------------------------------------------------------------------------------------------------------------------------------------------------------------------------------------------------------------------------------------------------------|
|                                               | <p>8) #3 OR #4<br/>9) #5 OR #6<br/>10) #7 AND #8 AND #9 AND [embase]/lim = 2,869 results</p>                                                                                                                                                                                                                                                                                                                                                                                                                                                                                                                                                                                                                                                                                                                                                                                                                                                                                                                                                                                                                                                                                                                                                                                                                                                                                                                                                                                                                                                                                                                                                                                                                                                                                                                                                                                                                                                                                                                                                                                                                                                                                                                                                                                                                                                                                                                                                                                                                                                                                                                                                                                                                                                                                                                                                                                                                       |
| <p>MEDLINE<br/>(via EBSCO)<br/>2025-07-07</p> | <p>S1: TI ( "Self-management" OR "Self-care" OR Selfcare OR "self-help" OR "Self-treatment" ) OR AB ( "Self-management" OR "Self-care" OR Selfcare OR "self-help" OR "Self-treatment" ) OR SU ( "Self-management" OR "Self-care" OR Selfcare OR "self-help" OR "Self-treatment" )</p> <p>S2: (MH "Self-Management") OR (MH "Self-Care")</p> <p>S3: TI ( Injur* OR musculoskeletal* OR "musculo-skeletal" OR MSK OR "chronic pain" OR LBP OR “low back pain” OR fracture* OR sprain* OR rupture* OR tear* OR osteoarthritis OR OA OR tendon* OR tenosyn* OR bursopath* OR bursitis OR epicondyl* OR "tennis elbow" OR "golfer's elbow" OR spondyl* OR whiplash OR impingement OR “frozen shoulder” OR capsul* OR “labr* tear” OR "shoulder instability" OR dislocation OR subluxation OR luxation OR “trigger finger” OR “lower back pain” OR lumbalgia OR “lumbar pain” OR stenosis OR spondyl* OR menisc* OR sciatica OR “carpal tunnel*” OR radiculopath* OR “cervicobrachial*” OR “back ache” OR lumbago OR ((neck or back or lumbar or shoulder* or arm* or forearm* or wrist* or hand* or finger* or joint* or hip or knee) N1 (tension or pain or ache* or injur* or disorder* or disease*)) ) OR AB ( Injur* OR musculoskeletal* OR "musculo-skeletal" OR MSK OR "chronic pain" OR LBP OR “low back pain” OR fracture* OR sprain* OR rupture* OR tear* OR osteoarthritis OR OA OR tendon* OR tenosyn* OR bursopath* OR bursitis OR epicondyl* OR "tennis elbow" OR "golfer's elbow" OR spondyl* OR whiplash OR impingement OR “frozen shoulder” OR capsul* OR “labr* tear” OR "shoulder instability" OR dislocation OR subluxation OR luxation OR “trigger finger” OR “lower back pain” OR lumbalgia OR “lumbar pain” OR stenosis OR spondyl* OR menisc* OR sciatica OR “carpal tunnel*” OR radiculopath* OR “cervicobrachial*” OR “back ache” OR lumbago OR ((neck or back or lumbar or shoulder* or arm* or forearm* or wrist* or hand* or finger* or joint* or hip or knee) N1 (tension or pain or ache* or injur* or disorder* or disease*)) ) OR SU ( Injur* OR musculoskeletal* OR "musculo-skeletal" OR MSK OR "chronic pain" OR LBP OR “low back pain” OR fracture* OR sprain* OR rupture* OR tear* OR osteoarthritis OR OA OR tendon* OR tenosyn* OR bursopath* OR bursitis OR epicondyl* OR "tennis elbow" OR "golfer's elbow" OR spondyl* OR whiplash OR impingement OR “frozen shoulder” OR capsul* OR “labr* tear” OR "shoulder instability" OR dislocation OR subluxation OR luxation OR “trigger finger” OR “lower back pain” OR lumbalgia OR “lumbar pain” OR stenosis OR spondyl* OR menisc* OR sciatica OR “carpal tunnel*” OR radiculopath* OR “cervicobrachial*” OR “back ache” OR lumbago OR ((neck or back or lumbar or shoulder* or arm* or forearm* or wrist* or hand* or finger* or joint* or hip or knee) N1 (tension or pain or ache* or injur* or disorder* or disease*)) )</p> |

Self-management interventions for work participation in patients with musculoskeletal disorders:  
a scoping review

|  |                                                                                                                                                                                                                                                                                                                                                                                                                                                                                                                                                                                                                                                                                                                                                                                                                                                                                                                                                                                                                                                                                                                                                                                                                                                                                                                                                                                                                                                                                                                                                                                                                                                                                                                                                                                                                                                                                                                                                                                                                                                                                                                                                                                                                                                                                                                                                                                                                                                                                                   |
|--|---------------------------------------------------------------------------------------------------------------------------------------------------------------------------------------------------------------------------------------------------------------------------------------------------------------------------------------------------------------------------------------------------------------------------------------------------------------------------------------------------------------------------------------------------------------------------------------------------------------------------------------------------------------------------------------------------------------------------------------------------------------------------------------------------------------------------------------------------------------------------------------------------------------------------------------------------------------------------------------------------------------------------------------------------------------------------------------------------------------------------------------------------------------------------------------------------------------------------------------------------------------------------------------------------------------------------------------------------------------------------------------------------------------------------------------------------------------------------------------------------------------------------------------------------------------------------------------------------------------------------------------------------------------------------------------------------------------------------------------------------------------------------------------------------------------------------------------------------------------------------------------------------------------------------------------------------------------------------------------------------------------------------------------------------------------------------------------------------------------------------------------------------------------------------------------------------------------------------------------------------------------------------------------------------------------------------------------------------------------------------------------------------------------------------------------------------------------------------------------------------|
|  | <p>S4: (MH "Occupational Injuries") OR (MH "Musculoskeletal Pain") OR (MH "Musculoskeletal Diseases") OR (MH "Occupational Diseases") OR (MH "Wounds and Injuries") OR (MH "Ankle Injuries") OR (MH "Athletic Injuries") OR (MH "Shoulder Injuries") OR (MH "Hand Injuries") OR (MH "Foot Injuries") OR (MH "Arm Injuries") OR (MH "Neck Injuries") OR (MH "Forearm Injuries") OR (MH "Knee Injuries") OR (MH "Back Injuries") OR (MH "Hip Injuries") OR (MH "Finger Injuries") OR (MH "Elbow Injuries") OR (MH "Tendon Injuries") OR (MH "Leg Injuries") OR (MH "Wrist Injuries") OR (MH "Rotator Cuff Injuries") OR (MH "Peripheral Nerve Injuries") OR (MH "Sprains and Strains") OR (MH "Soft Tissue Injuries") OR (MH "Peripheral Nervous System Diseases")</p> <p>S5: TI ( occupation* OR absenteeism OR presenteeism OR RTW OR "sick* leave*" OR "sick* absence*" OR "medical leave*" OR workplace OR employment OR "return to work" OR "work performance" OR "work ability" OR "stay at work" OR "remain at work" OR "work resumption" OR "work* outcome*" OR "work reintegration" OR worker OR employee OR (occupational N1 (health OR risk*)) OR "work* disabilit*" OR "work absence*" OR "sick listed" OR "sick day*" ) OR AB ( occupation* OR absenteeism OR presenteeism OR RTW OR "sick* leave*" OR "sick* absence*" OR "medical leave*" OR workplace OR employment OR "return to work" OR "work performance" OR "work ability" OR "stay at work" OR "remain at work" OR "work resumption" OR "work* outcome*" OR "work reintegration" OR worker OR employee OR (occupational N1 (health OR risk*)) OR "work* disabilit*" OR "work absence*" OR "sick listed" OR "sick day*" ) OR SU ( occupation* OR absenteeism OR presenteeism OR RTW OR "sick* leave*" OR "sick* absence*" OR "medical leave*" OR workplace OR employment OR "return to work" OR "work performance" OR "work ability" OR "stay at work" OR "remain at work" OR "work resumption" OR "work* outcome*" OR "work reintegration" OR worker OR employee OR (occupational N1 (health OR risk*)) OR "work* disabilit*" OR "work absence*" OR "sick listed" OR "sick day*" )</p> <p>S6: (MH "Occupations") OR (MH "Work") OR (MH "Occupational Health") OR (MH "Insurance, Health") OR (MH "Insurance, Disability") OR (MH "Unemployment") OR (MH "Employment") OR (MH "Absenteeism") OR (MH "Sick Leave")</p> <p>S7: S1 or S2</p> <p>S8: S3 or S4</p> <p>S9: S5 or S6</p> <p>S10: S7 and S8 and S9 = 1,145 results</p> |
|--|---------------------------------------------------------------------------------------------------------------------------------------------------------------------------------------------------------------------------------------------------------------------------------------------------------------------------------------------------------------------------------------------------------------------------------------------------------------------------------------------------------------------------------------------------------------------------------------------------------------------------------------------------------------------------------------------------------------------------------------------------------------------------------------------------------------------------------------------------------------------------------------------------------------------------------------------------------------------------------------------------------------------------------------------------------------------------------------------------------------------------------------------------------------------------------------------------------------------------------------------------------------------------------------------------------------------------------------------------------------------------------------------------------------------------------------------------------------------------------------------------------------------------------------------------------------------------------------------------------------------------------------------------------------------------------------------------------------------------------------------------------------------------------------------------------------------------------------------------------------------------------------------------------------------------------------------------------------------------------------------------------------------------------------------------------------------------------------------------------------------------------------------------------------------------------------------------------------------------------------------------------------------------------------------------------------------------------------------------------------------------------------------------------------------------------------------------------------------------------------------------|

Self-management interventions for work participation in patients with musculoskeletal disorders:  
a scoping review

|                                                   |                                                                                                                                                                                                                                                                                                                                                                                                                                                                                                                                                                                                                                                                                                                                                                                                                                                                                                                                                                                                                                                                                                                                                                                                                                                                                                                                                                                                                                                                           |
|---------------------------------------------------|---------------------------------------------------------------------------------------------------------------------------------------------------------------------------------------------------------------------------------------------------------------------------------------------------------------------------------------------------------------------------------------------------------------------------------------------------------------------------------------------------------------------------------------------------------------------------------------------------------------------------------------------------------------------------------------------------------------------------------------------------------------------------------------------------------------------------------------------------------------------------------------------------------------------------------------------------------------------------------------------------------------------------------------------------------------------------------------------------------------------------------------------------------------------------------------------------------------------------------------------------------------------------------------------------------------------------------------------------------------------------------------------------------------------------------------------------------------------------|
| <p>Scopus<br/>2025-07-07</p>                      | <p>(TITLE-ABS-KEY("Self-management" OR "Self-care" OR selfcare OR "self-help" OR "Self-treatment") AND TITLE-ABS-KEY(injur* OR musculoskeletal* OR "musculo-skeletal" OR msk OR "chronic pain" OR lbp OR "low back pain" OR fracture* OR sprain* OR rupture* OR tear* OR osteoarthritis OR OA OR tendon* OR tenosyn* OR bursopath* OR bursitis OR epicondyl* OR "tennis elbow" OR "golfer* elbow" OR spondyl* OR whiplash OR impingement OR "frozen shoulder" OR capsul* OR "labr* tear" OR "shoulder instability" OR dislocation OR subluxation OR luxation OR "trigger finger" OR "lower back pain" OR lumbalgia OR "lumbar pain" OR stenosis OR spondyl* OR menisc* OR sciatica OR "carpal tunnel*" OR radiculopath* OR cervicobrachial* OR "back ache" OR lumbago OR ( ( neck OR back OR lumbar OR shoulder* OR arm* OR forearm* OR wrist* OR hand* OR finger* OR joint* OR hip OR knee ) W/1 ( tension OR pain OR ache* OR injur* OR disorder* OR disease* ) ) ) AND TITLE-ABS-KEY(occupation* OR absenteeism OR presenteeism OR rtw OR "sick* leave*" OR "sick* absence*" OR "medical leave*" OR workplace OR employment OR "return to work" OR "work performance" OR "work ability" OR "stay at work" OR "remain at work" OR "work resumption" OR "work* outcome*" OR "work reintegration" OR worker OR employee OR ( occupational W/1 ( health OR risk* ) ) OR "work* disabilit*" OR "work absence*" OR "sick listed" OR "sick day*"))</p> <p>= 1,696 results</p> |
| <p>SPORTDiscus<br/>(via EBSCO)<br/>2025-07-07</p> | <p>S1: TI ( "Self-management" OR "Self-care" OR Selfcare OR "self-help" OR "Self-treatment" ) OR AB ( "Self-management" OR "Self-care" OR Selfcare OR "self-help" OR "Self-treatment" ) OR SU ( "Self-management" OR "Self-care" OR Selfcare OR "self-help" OR "Self-treatment" )</p> <p>S2: (DE "HEALTH self-care")</p> <p>S3: TI ( Injur* OR musculoskeletal* OR "musculo-skeletal" OR MSK OR "chronic pain" OR LBP OR “low back pain” OR fracture* OR sprain* OR rupture* OR tear* OR osteoarthritis OR OA OR tendon* OR tenosyn* OR bursopath* OR bursitis OR epicondyl* OR "tennis elbow" OR "golfer's elbow" OR spondyl* OR whiplash OR impingement OR “frozen shoulder” OR capsul* OR “labr* tear” OR "shoulder instability" OR dislocation OR subluxation OR luxation OR “trigger finger” OR “lower back pain” OR lumbalgia OR “lumbar pain” OR stenosis OR spondyl* OR menisc* OR sciatica OR “carpal tunnel*” OR radiculopath* OR “cervicobrachial*” OR “back ache” OR lumbago OR ((neck or back or lumbar or shoulder* or arm* or forearm* or wrist* or hand* or finger* or joint* or hip or knee) N1 (tension or pain or ache* or injur* or disorder* or disease*)) ) OR AB ( Injur* OR musculoskeletal* OR "musculo-skeletal" OR MSK OR "chronic pain" OR LBP OR “low back pain” OR fracture* OR sprain* OR rupture* OR tear* OR osteoarthritis OR OA OR tendon* OR tenosyn* OR bursopath* OR bursitis OR epicondyl* OR "tennis elbow" OR "golfer's</p>      |

Self-management interventions for work participation in patients with musculoskeletal disorders:  
a scoping review

|  |                                                                                                                                                                                                                                                                                                                                                                                                                                                                                                                                                                                                                                                                                                                                                                                                                                                                                                                                                                                                                                                                                                                                                                                                                                                                                                                                                                                                                                                                                                                                                                                                                                                                                                                                                                                                                                                                                                                                                                                                                                                                                                                                                                                                                                                                                                                                                                                                                                                                                                                                                                                                                                                                                                                                                                                                                                                                                                                                                                                                                    |
|--|--------------------------------------------------------------------------------------------------------------------------------------------------------------------------------------------------------------------------------------------------------------------------------------------------------------------------------------------------------------------------------------------------------------------------------------------------------------------------------------------------------------------------------------------------------------------------------------------------------------------------------------------------------------------------------------------------------------------------------------------------------------------------------------------------------------------------------------------------------------------------------------------------------------------------------------------------------------------------------------------------------------------------------------------------------------------------------------------------------------------------------------------------------------------------------------------------------------------------------------------------------------------------------------------------------------------------------------------------------------------------------------------------------------------------------------------------------------------------------------------------------------------------------------------------------------------------------------------------------------------------------------------------------------------------------------------------------------------------------------------------------------------------------------------------------------------------------------------------------------------------------------------------------------------------------------------------------------------------------------------------------------------------------------------------------------------------------------------------------------------------------------------------------------------------------------------------------------------------------------------------------------------------------------------------------------------------------------------------------------------------------------------------------------------------------------------------------------------------------------------------------------------------------------------------------------------------------------------------------------------------------------------------------------------------------------------------------------------------------------------------------------------------------------------------------------------------------------------------------------------------------------------------------------------------------------------------------------------------------------------------------------------|
|  | <p>elbow" OR spondyl* OR whiplash OR impingement OR "frozen shoulder" OR capsul* OR "labr* tear" OR "shoulder instability" OR dislocation OR subluxation OR luxation OR "trigger finger" OR "lower back pain" OR lumbalgia OR "lumbar pain" OR stenosis OR spondyl* OR menisc* OR sciatica OR "carpal tunnel*" OR radiculopath* OR "cervicobrachial*" OR "back ache" OR lumbago OR ((neck or back or lumbar or shoulder* or arm* or forearm* or wrist* or hand* or finger* or joint* or hip or knee) N1 (tension or pain or ache* or injur* or disorder* or disease*)) ) OR SU ( Injur* OR musculoskeletal* OR "musculo-skeletal" OR MSK OR "chronic pain" OR LBP OR "low back pain" OR fracture* OR sprain* OR rupture* OR tear* OR osteoarthritis OR OA OR tendon* OR tenosyn* OR bursopath* OR bursitis OR epicondyl* OR "tennis elbow" OR "golfer's elbow" OR spondyl* OR whiplash OR impingement OR "frozen shoulder" OR capsul* OR "labr* tear" OR "shoulder instability" OR dislocation OR subluxation OR luxation OR "trigger finger" OR "lower back pain" OR lumbalgia OR "lumbar pain" OR stenosis OR spondyl* OR menisc* OR sciatica OR "carpal tunnel*" OR radiculopath* OR "cervicobrachial*" OR "back ache" OR lumbago OR ((neck or back or lumbar or shoulder* or arm* or forearm* or wrist* or hand* or finger* or joint* or hip or knee) N1 (tension or pain or ache* or injur* or disorder* or disease*)) )</p> <p>S4: DE "JOINT instability" OR DE "OCCUPATIONAL diseases" OR DE "LEG injuries" OR DE "FOOT injuries" OR DE "WRIST injuries" OR DE "SKELETAL muscle injuries" OR DE "SHOULDER joint injuries" OR DE "SHOULDER injuries" OR DE "SCAPULA injuries" OR DE "SACRUM injuries" OR DE "RIB injuries" OR DE "NECK injuries" OR DE "MUSCULOSKELETAL system injuries" OR DE "MUSCLE injuries" OR DE "MENISCUS injuries" OR DE "KNEE injuries" OR DE "JOINT injuries" OR DE "HIP joint injuries" OR DE "HEEL injuries" OR DE "HAND injuries" OR DE "FOREARM injuries" OR DE "FINGER joint injuries" OR DE "FINGER injuries" OR DE "ELBOW injuries" OR DE "BONE injuries" OR DE "BACK injuries" OR DE "ARTICULAR cartilage injuries" OR DE "ARM injuries" OR DE "ANKLE injuries" OR DE "TENDON injuries" OR DE "LIGAMENT injuries" OR DE "ARTICULAR ligament injuries" OR DE "SOFT tissue injuries" OR DE "SPRAINS" OR DE "ROTATOR cuff injuries" OR DE "OVERUSE injuries" OR DE "SPORTS injuries" OR DE "WOUNDS &amp; injuries" OR DE "PERIPHERAL neuropathy" OR DE "ENTRAPMENT neuropathies"</p> <p>S5: TI ( occupation* OR absenteeism OR presenteeism OR RTW OR "sick* leave*" OR "sick* absence*" OR "medical leave*" OR workplace OR employment OR "return to work" OR "work performance" OR "work ability" OR "stay at work" OR "remain at work" OR "work resumption" OR "work* outcome*" OR "work reintegration" OR worker OR employee OR (occupational N1 (health OR risk*)) OR "work* disabilit*" OR "work absence*" OR "sick listed" OR "sick day*" ) OR AB ( occupation* OR</p> |
|--|--------------------------------------------------------------------------------------------------------------------------------------------------------------------------------------------------------------------------------------------------------------------------------------------------------------------------------------------------------------------------------------------------------------------------------------------------------------------------------------------------------------------------------------------------------------------------------------------------------------------------------------------------------------------------------------------------------------------------------------------------------------------------------------------------------------------------------------------------------------------------------------------------------------------------------------------------------------------------------------------------------------------------------------------------------------------------------------------------------------------------------------------------------------------------------------------------------------------------------------------------------------------------------------------------------------------------------------------------------------------------------------------------------------------------------------------------------------------------------------------------------------------------------------------------------------------------------------------------------------------------------------------------------------------------------------------------------------------------------------------------------------------------------------------------------------------------------------------------------------------------------------------------------------------------------------------------------------------------------------------------------------------------------------------------------------------------------------------------------------------------------------------------------------------------------------------------------------------------------------------------------------------------------------------------------------------------------------------------------------------------------------------------------------------------------------------------------------------------------------------------------------------------------------------------------------------------------------------------------------------------------------------------------------------------------------------------------------------------------------------------------------------------------------------------------------------------------------------------------------------------------------------------------------------------------------------------------------------------------------------------------------------|

Self-management interventions for work participation in patients with musculoskeletal disorders:  
a scoping review

|                                        |                                                                                                                                                                                                                                                                                                                                                                                                                                                                                                                                                                                                                                                                                                                                                                                                                                                                                                                                                                                                                                                                                                                                                                                                                                                                                                                                                                                                                                                                                                                                                               |
|----------------------------------------|---------------------------------------------------------------------------------------------------------------------------------------------------------------------------------------------------------------------------------------------------------------------------------------------------------------------------------------------------------------------------------------------------------------------------------------------------------------------------------------------------------------------------------------------------------------------------------------------------------------------------------------------------------------------------------------------------------------------------------------------------------------------------------------------------------------------------------------------------------------------------------------------------------------------------------------------------------------------------------------------------------------------------------------------------------------------------------------------------------------------------------------------------------------------------------------------------------------------------------------------------------------------------------------------------------------------------------------------------------------------------------------------------------------------------------------------------------------------------------------------------------------------------------------------------------------|
|                                        | <p>absenteeism OR presenteeism OR RTW OR "sick* leave*" OR "sick* absence*" OR "medical leave*" OR workplace OR employment OR "return to work" OR "work performance" OR "work ability" OR "stay at work" OR "remain at work" OR "work resumption" OR "work* outcome*" OR "work reintegration" OR worker OR employee OR (occupational N1 (health OR risk*)) OR "work* disabilit*" OR "work absence*" OR "sick listed" OR "sick day*" ) OR SU ( occupation* OR absenteeism OR presenteeism OR RTW OR "sick* leave*" OR "sick* absence*" OR "medical leave*" OR workplace OR employment OR "return to work" OR "work performance" OR "work ability" OR "stay at work" OR "remain at work" OR "work resumption" OR "work* outcome*" OR "work reintegration" OR worker OR employee OR (occupational N1 (health OR risk*)) OR "work* disabilit*" OR "work absence*" OR "sick listed" OR "sick day*" )</p> <p>S6: DE "HEALTH insurance" OR DE "OCCUPATIONAL rehabilitation"</p> <p>S7: S1 or S2</p> <p>S8: S3 or S4</p> <p>S9: S5 or S6</p> <p>S10: S7 and S8 and S9 = 161 results</p>                                                                                                                                                                                                                                                                                                                                                                                                                                                                               |
| <p>Cochrane Library<br/>2025-07-07</p> | <ol style="list-style-type: none"> <li>1) ("Self-management" OR "Self-care" OR Selfcare OR "self-help" OR "Self-treatment"):ti,ab,kw             <ol style="list-style-type: none"> <li>a. Limits: Search word variations</li> </ol> </li> <li>2) MeSH descriptor: [Self Care] explode all trees</li> <li>3) MeSH descriptor: [Self-Management] explode all trees</li> <li>4) (Injur* OR musculoskeletal* OR "musculo-skeletal" OR MSK OR "chronic pain" OR LBP OR "low back pain" OR fracture* OR sprain* OR rupture* OR tear* OR osteoarthritis OR OA OR tendon* OR tenosyn* OR bursopath* OR bursitis OR epicondyl* OR "tennis elbow" OR (golfer* NEXT elbow) OR spondyl* OR whiplash OR impingement OR "frozen shoulder" OR capsul* OR (labr* NEXT tear) OR "shoulder instability" OR dislocation OR subluxation OR luxation OR "trigger finger" OR "lower back pain" OR lumbalgia OR "lumbar pain" OR stenosis OR spondyl* OR menisc* OR sciatica OR (carpal NEXT tunnel*) OR radiculopath* OR cervicobrachial* OR "back ache" OR lumbago OR ((neck or back or lumbar or shoulder* or arm* or forearm* or wrist* or hand* or finger* or joint* or hip or knee) NEXT (tension or pain or ache* or injur* or disorder* or disease*))) :ti,ab,kw</li> <li>5) MeSH descriptor: [Accidents, Occupational] explode all trees</li> <li>6) MeSH descriptor: [Occupational Injuries] explode all trees</li> <li>7) MeSH descriptor: [Musculoskeletal Pain] explode all trees</li> <li>8) MeSH descriptor: [Musculoskeletal Diseases] explode all trees</li> </ol> |

Self-management interventions for work participation in patients with musculoskeletal disorders:  
a scoping review

|  |                                                                                                                                                                                                                                                                                                                                                                                                                                                                                                                                                                                                                                                                                                                                                                                                                                                                                                                                                                                                                                                                                                                                                                                                                                                                                                                                                                                                                                                                                                                                                                                                                                                                                                                                                                                                                                                                                                                                                                                                                                                                                                                                                                                                                                                                                                                                                                                                                                                                                                                                                                                                                                                                                                                                                                                                                                                                                         |
|--|-----------------------------------------------------------------------------------------------------------------------------------------------------------------------------------------------------------------------------------------------------------------------------------------------------------------------------------------------------------------------------------------------------------------------------------------------------------------------------------------------------------------------------------------------------------------------------------------------------------------------------------------------------------------------------------------------------------------------------------------------------------------------------------------------------------------------------------------------------------------------------------------------------------------------------------------------------------------------------------------------------------------------------------------------------------------------------------------------------------------------------------------------------------------------------------------------------------------------------------------------------------------------------------------------------------------------------------------------------------------------------------------------------------------------------------------------------------------------------------------------------------------------------------------------------------------------------------------------------------------------------------------------------------------------------------------------------------------------------------------------------------------------------------------------------------------------------------------------------------------------------------------------------------------------------------------------------------------------------------------------------------------------------------------------------------------------------------------------------------------------------------------------------------------------------------------------------------------------------------------------------------------------------------------------------------------------------------------------------------------------------------------------------------------------------------------------------------------------------------------------------------------------------------------------------------------------------------------------------------------------------------------------------------------------------------------------------------------------------------------------------------------------------------------------------------------------------------------------------------------------------------------|
|  | <p>9) MeSH descriptor: [Occupational Diseases] explode all trees</p> <p>10) MeSH descriptor: [Neck Injuries] explode all trees</p> <p>11) MeSH descriptor: [Sprains and Strains] explode all trees</p> <p>12) MeSH descriptor: [Arm Injuries] explode all trees</p> <p>13) MeSH descriptor: [Athletic Injuries] explode all trees</p> <p>14) MeSH descriptor: [Hand Injuries] explode all trees</p> <p>15) MeSH descriptor: [Wounds and Injuries] explode all trees</p> <p>16) MeSH descriptor: [Tendon Injuries] explode all trees</p> <p>17) MeSH descriptor: [Shoulder Injuries] explode all trees</p> <p>18) MeSH descriptor: [Leg Injuries] explode all trees</p> <p>19) MeSH descriptor: [Knee Injuries] explode all trees</p> <p>20) MeSH descriptor: [Hip Injuries] explode all trees</p> <p>21) MeSH descriptor: [Forearm Injuries] explode all trees</p> <p>22) MeSH descriptor: [Foot Injuries] explode all trees</p> <p>23) MeSH descriptor: [Finger Injuries] explode all trees</p> <p>24) MeSH descriptor: [Elbow Injuries] explode all trees</p> <p>25) MeSH descriptor: [Back Injuries] explode all trees</p> <p>26) MeSH descriptor: [Arm Injuries] explode all trees</p> <p>27) MeSH descriptor: [Ankle Injuries] explode all trees</p> <p>28) MeSH descriptor: [Soft Tissue Injuries] explode all trees</p> <p>29) MeSH descriptor: [Rotator Cuff Injuries] explode all trees</p> <p>30) MeSH descriptor: [Peripheral Nervous System Diseases] explode all trees</p> <p>31) (occupation* OR absenteeism OR presenteeism OR RTW OR (sick* NEXT leave*) OR (sick* NEXT absence*) OR (medical NEXT leave*) OR workplace OR employment OR “return to work” OR “work performance” OR “work ability” OR “stay at work” OR “remain at work” OR “work resumption” OR (work* NEXT outcome*) OR “work reintegration” OR worker OR employee OR (occupational NEXT (health OR risk*)) OR (work* NEXT disabilit*) OR (work NEXT absence*) OR “sick listed” OR (sick NEXT day*)):ti,ab,kw</p> <p>32) MeSH descriptor: [Occupations] explode all trees</p> <p>33) MeSH descriptor: [Occupational Health] explode all trees</p> <p>34) MeSH descriptor: [Insurance, Health] explode all trees</p> <p>35) MeSH descriptor: [Insurance, Disability] explode all trees</p> <p>36) MeSH descriptor: [Absenteeism] explode all trees</p> <p>37) MeSH descriptor: [Sick Leave] explode all trees</p> <p>38) MeSH descriptor: [Return to Work] explode all trees</p> <p>39) MeSH descriptor: [Work] explode all trees</p> <p>40) MeSH descriptor: [Employment] explode all trees</p> <p>41) #1 or #2 or #3</p> <p>42) #4 or #5 or #6 or #7 or #8 or #9 or #10 or #11 or #12 or #13 or #14 or #15 or #16 or #17 or #18 or #19 or #20 or #21 or #22 or #23 or #24 or #25 or #26 or #27 or #28 or #29 or #30</p> <p>43) #31 or #32 or #33 or #34 or #35 or #36 or #37 or #38 or #39 or #40</p> |
|--|-----------------------------------------------------------------------------------------------------------------------------------------------------------------------------------------------------------------------------------------------------------------------------------------------------------------------------------------------------------------------------------------------------------------------------------------------------------------------------------------------------------------------------------------------------------------------------------------------------------------------------------------------------------------------------------------------------------------------------------------------------------------------------------------------------------------------------------------------------------------------------------------------------------------------------------------------------------------------------------------------------------------------------------------------------------------------------------------------------------------------------------------------------------------------------------------------------------------------------------------------------------------------------------------------------------------------------------------------------------------------------------------------------------------------------------------------------------------------------------------------------------------------------------------------------------------------------------------------------------------------------------------------------------------------------------------------------------------------------------------------------------------------------------------------------------------------------------------------------------------------------------------------------------------------------------------------------------------------------------------------------------------------------------------------------------------------------------------------------------------------------------------------------------------------------------------------------------------------------------------------------------------------------------------------------------------------------------------------------------------------------------------------------------------------------------------------------------------------------------------------------------------------------------------------------------------------------------------------------------------------------------------------------------------------------------------------------------------------------------------------------------------------------------------------------------------------------------------------------------------------------------------|

Self-management interventions for work participation in patients with musculoskeletal disorders:  
a scoping review

|                                                                |                                                                                                                                                                                                                                                                                                                                                                                                                                                                                                                                                                                                                                                                                                                                                                  |
|----------------------------------------------------------------|------------------------------------------------------------------------------------------------------------------------------------------------------------------------------------------------------------------------------------------------------------------------------------------------------------------------------------------------------------------------------------------------------------------------------------------------------------------------------------------------------------------------------------------------------------------------------------------------------------------------------------------------------------------------------------------------------------------------------------------------------------------|
|                                                                | 44) #41 and #42 and #43 = 496 results (6 reviews, 490 trials)                                                                                                                                                                                                                                                                                                                                                                                                                                                                                                                                                                                                                                                                                                    |
| Physiotherapy<br>Evidence<br>Database<br>(PEDro)<br>2025-07-07 | <p>Via Advanced search: no restrictions on year of publication, method (study design), source and score.</p> <ol style="list-style-type: none"> <li>1) Self-management AND *Musculoskeletal AND *work; 112 results generated / 16 results exported</li> <li>2) Self-management AND *pain AND *work; 121 results generated / 3 results exported</li> <li>3) Self-treatment AND *Musculoskeletal AND *work; 180 results generated / 1 results exported</li> <li>4) Self-treatment AND *pain AND *work; 200 results / 0 results exported</li> <li>5) Self-care AND *Musculoskeletal AND *work; 150 results generated / 0 results exported</li> <li>6) Self-care AND *pain AND *work; 165 results generated / 0 results exported</li> </ol> <p>Total: 20 results</p> |



## Appendix 2. Grey literature search strategies

| Database                                                      | Search strategy                                                                                                                                                                                                                                                                                                                                                                                                                                                                                                                                                                                                                                                                                                                                                                                                                                                                                                                                                                                                                                                                                                                                                                                                                                                                                                                                                                                                                                                                                                                                                                                                                                                                                                                                                                                                                                                                                                                                                                                                                                                                                                       |
|---------------------------------------------------------------|-----------------------------------------------------------------------------------------------------------------------------------------------------------------------------------------------------------------------------------------------------------------------------------------------------------------------------------------------------------------------------------------------------------------------------------------------------------------------------------------------------------------------------------------------------------------------------------------------------------------------------------------------------------------------------------------------------------------------------------------------------------------------------------------------------------------------------------------------------------------------------------------------------------------------------------------------------------------------------------------------------------------------------------------------------------------------------------------------------------------------------------------------------------------------------------------------------------------------------------------------------------------------------------------------------------------------------------------------------------------------------------------------------------------------------------------------------------------------------------------------------------------------------------------------------------------------------------------------------------------------------------------------------------------------------------------------------------------------------------------------------------------------------------------------------------------------------------------------------------------------------------------------------------------------------------------------------------------------------------------------------------------------------------------------------------------------------------------------------------------------|
| ProQuest<br>Dissertations<br>& Theses<br>Global<br>2025-07-07 | <p>(noft("Self-management" OR "Self-care" OR Selfcare OR "self-help" OR "Self-treatment")) OR subject("self help" OR "self help programs" OR "self management")) AND (noft(Injur* OR musculoskeletal* OR "musculo-skeletal" OR MSK OR "chronic pain" OR LBP OR "low back pain" OR fracture* OR sprain* OR rupture* OR tear* OR osteoarthritis OR OA OR tendon* OR tenosyn* OR bursopath* OR bursitis OR epicondyl* OR "tennis elbow" OR "golfer's elbow" OR spondyl* OR whiplash OR impingement OR "frozen shoulder" OR capsul* OR "labr* tear" OR "shoulder instability" OR dislocation OR subluxation OR luxation OR "trigger finger" OR "lower back pain" OR lumbalgia OR "lumbar pain" OR stenosis OR spondyl* OR menisc* OR sciatica OR "carpal tunnel*" OR radiculopath* OR "cervicobrachial*" OR "back ache" OR lumbago OR ((neck OR back OR lumbar OR shoulder* OR arm* OR forearm* OR wrist* OR hand* OR finger* OR joint* OR hip OR knee) NEAR/1 (tension OR pain OR ache* OR injur* OR disorder* OR disease*))) OR subject(("injuries" OR "occupational diseases" OR "joint and ligament injuries" OR "occupational accidents" OR "peripheral neuropathy" OR "musculoskeletal diseases")) AND (noft(occupation* OR absenteeism OR presenteeism OR RTW OR "sick* leave*" OR "sick* absence*" OR "medical leave*" OR workplace OR employment OR "return to work" OR "work performance" OR "work ability" OR "stay at work" OR "remain at work" OR "work resumption" OR "work* outcome*" OR "work reintegration" OR worker OR employee OR (occupational NEAR/1 (health OR risk*)) OR "work* disabilit*" OR "work absence*" OR "sick listed" OR "sick day*") OR subject("health insurance" OR "professions" OR "employment" OR "occupations" OR "employee absenteeism" OR "occupational health" OR "workers with disabilities" OR "sick leave" OR "return to work programs" OR "unemployment insurance" OR "absenteeism" OR "workers compensation" OR "professional occupations" OR "disability insurance" OR "unemployment" OR "workforce" OR "workers' compensation" OR "workers"))</p> <p>= 134 results</p> |
| Google scholar<br>2025-07-17                                  | <p>("Self-management" OR "Self-care" OR Selfcare OR "self-help" OR "Self-treatment")</p> <p>AND</p> <p>(Injury OR injuries OR "musculoskeletal" OR "musculo-skeletal" OR MSK OR "chronic pain" OR "low back pain" OR "back pain" OR "osteoarthritis" OR "Neck pain" OR "tendinopathy")</p> <p>AND</p> <p>(occupation OR occupational OR absenteeism OR presenteeism OR RTW OR "sick leave" OR "sickness absence" OR "medical leave" OR workplace OR employment OR "return to work" OR "work performance" OR "work ability" OR "stay at work" OR "remain at work" OR "work resumption" OR "work outcome" OR "work reintegration" OR worker OR employee OR "work disability" OR "work disabilities" OR "work absence" OR "sick</p>                                                                                                                                                                                                                                                                                                                                                                                                                                                                                                                                                                                                                                                                                                                                                                                                                                                                                                                                                                                                                                                                                                                                                                                                                                                                                                                                                                                      |

Self-management interventions for work participation in patients with musculoskeletal disorders:  
a scoping review

|                             |                                                                                                                                                                                                                                                                                                                                                                                                                     |
|-----------------------------|---------------------------------------------------------------------------------------------------------------------------------------------------------------------------------------------------------------------------------------------------------------------------------------------------------------------------------------------------------------------------------------------------------------------|
|                             | <p>listed” OR “sick day” OR “stay at work” OR “sustainable return to work” OR “work participation”)</p> <p>First 200 results screened<br/>= 20 results</p>                                                                                                                                                                                                                                                          |
| Google search<br>2025-07-17 | <p>Advanced search in Google</p> <ol style="list-style-type: none"><li>1) All these words: self-management, musculoskeletal, work<ol style="list-style-type: none"><li>a. Screened the first 200 results. Exported 7 citations.</li></ol></li><li>2) All these words: self-management, pain, work<ol style="list-style-type: none"><li>a. Screened the first 200 results. Exported 2 citations.</li></ol></li></ol> |

### Appendix 3. List of websites consulted (between June and August 2025)

1. Institut de recherche Robert-Sauvé en santé et en sécurité du travail:  
<https://www.irsst.qc.ca/>
2. Institute for Work & Health (IWH): <https://www.iwh.on.ca/>
3. National Institute for Occupational Safety and Health (NIOSH):  
<https://www.cdc.gov/niosh/index.htm>
4. National Institute of Disability Management and Research:  
<https://www.nidmar.ca/products/products.asp?cat=1>
5. Commission des normes, de l'équité, de la santé et de la sécurité du travail (CNESST):  
<http://www.cnesst.gouv.qc.ca/>
6. Finnish Institute of Occupational Health: <https://www.ttl.fi/en>
7. Canadian Centre for Occupational health and safety (CCOHS): <https://www.ccohs.ca/>
8. Partnership for Work, Health and Safety, University of British Columbia,  
<http://pwhs.ubc.ca/research/>
9. Workers' Compensation Board – Alberta: <https://www.wcb.ab.ca/about-wcb/research-program/>
10. Workers Compensation Board of Manitoba: <http://www.wcb.mb.ca/research-and-workplace-innovation-program-0>
11. Workplace Safety and Insurance Board (WSIB): <https://www.wsib.ca/fr>
12. WorkSafeBC: <https://www.worksafebc.com/en/about-us/research-services>
13. Safe Work Australia et organismes partenaires (régions et associations partenaires):  
<https://www.safeworkaustralia.gov.au/>
14. Agence nationale pour l'amélioration des conditions de travail (ANACT):  
<https://www.anact.fr/>
15. Digi4MSK project: <https://digi4msk.eu/>
16. Portail Gérer ma douleur: <https://gerermadouleur.ca/>
17. Centre d'action en prévention et réadaptation de l'incapacité au travail (CAPRIT) :  
<https://www.usherbrooke.ca/readaptation/centre-daction-en-prevention-et-readaptation-de-lincapacite-au-travail>
18. Agency for Healthcare Research and Quality (AHRQ) – Self-management support:  
<https://www.ahrq.gov/ncepcr/tools/self-mgmt/home.html>
19. The Institute for Safety Compensation and Recovery Research (ISCRR):  
[www.iscrr.com.au](http://www.iscrr.com.au)
20. Work Safe Victoria: <https://www.worksafe.vic.gov.au/>

#### Appendix 4. Classification of study type based on the constructs evaluated

| Type of study [1] | Construct assessed [1]          | Description                                                                                                                                                                                                                                                                                                  |
|-------------------|---------------------------------|--------------------------------------------------------------------------------------------------------------------------------------------------------------------------------------------------------------------------------------------------------------------------------------------------------------|
| Views studies     | Perspectives                    | General reflections or opinions of participants following a SM intervention. Focus is on broad perceptions and judgements.                                                                                                                                                                                   |
|                   | Experiences                     | First-person accounts of what it was like to participate in or use the SM intervention. Often narrative, emotional, or descriptive.                                                                                                                                                                          |
|                   | Needs                           | Reported needs of participants regarding the SM intervention, such as gaps in support, content, or resources they identify as necessary.                                                                                                                                                                     |
|                   | Understandings                  | Participants' comprehension or interpretation of SM principles in the workplace                                                                                                                                                                                                                              |
|                   | Views                           | Participants' explicit views and attitudes toward the SM intervention, but without structured evaluation.                                                                                                                                                                                                    |
| Process studies   | Acceptability [2]               | Assessment of participants' acceptability of the SM intervention based on the theoretical framework of acceptability defined by Sekhon et al. <sup>33</sup> Include structured evaluation of burden, ethicality, credibility, coherence, satisfaction, and self-efficacy to participate in the intervention. |
|                   | Accessibility                   | Extent to which participants can access the intervention (e.g., cost, time, location, digital literacy)                                                                                                                                                                                                      |
|                   | Barriers and facilitators       | Assessment of barriers and facilitators to the implementation of SM intervention                                                                                                                                                                                                                             |
|                   | Appropriateness [3]             | Evaluation of the appropriateness, suitability, relevance, and usefulness of intervention content by engaged partners (e.g., workers, experts, clinicians)                                                                                                                                                   |
|                   | Costs <sup>3</sup>              | Perceived or actual financial burden of the SM intervention and cost associated with implementing the intervention.                                                                                                                                                                                          |
|                   | Implementation and delivery [3] | Assessment of the implementation and delivery of SM interventions, including intervention fidelity, feasibility, adoption and engagement with the intervention, etc.                                                                                                                                         |

## Self-management interventions for work participation in patients with musculoskeletal disorders: a scoping review

|                            |                      |                                                                |
|----------------------------|----------------------|----------------------------------------------------------------|
| Outcome evaluation studies | Work-related outcome | Examples: RTW rate; Work ability; Absenteeism and Presenteeism |
|                            | General outcome      | Examples: Pain intensity; Disability; Self-efficacy            |

## References

1. Hong QN, Rees R, Sutcliffe K, Thomas J (2020) Variations of mixed methods reviews approaches: A case study. *Research Synthesis Methods* 11:795–811
2. Sekhon M, Cartwright M, Francis JJ (2017) Acceptability of healthcare interventions: An overview of reviews and development of a theoretical framework. *BMC Health Services Research* 17:1–13
3. Proctor E, Silmere H, Raghavan R, Hovmand P, Aarons G, Bunger A, Griffey R, Hensley M (2011) Outcomes for Implementation Research: Conceptual Distinctions, Measurement Challenges, and Research Agenda. *Adm Policy Ment Health* 38:65–76

**Appendix 5. Characteristics of the included studies (n=31)**

| <b>First author,<br/>date</b> | <b>Country</b>    | <b>Study design,<br/>sample size</b>                                                     | <b>Type of MSD<sup>a</sup></b>                                           | <b>Population:<br/>Sex, Age (mean)</b> | <b>Work status</b>                                                                                                                                  | <b>Type of study:<br/>Views, process or<br/>outcome evaluation<br/>study</b> |
|-------------------------------|-------------------|------------------------------------------------------------------------------------------|--------------------------------------------------------------------------|----------------------------------------|-----------------------------------------------------------------------------------------------------------------------------------------------------|------------------------------------------------------------------------------|
| Andersen, 2014<br>[1]         | Denmark           | Qualitative<br>phenomenological<br>study within a<br>randomized<br>controlled trial, n=7 | Back or upper<br>body<br>musculoskeletal<br>pain                         | Sex: 57% female<br>Age: 47 years       | All participants were<br>employed and sick-<br>listed before<br>participating in the<br>study                                                       | Views                                                                        |
| Andersen, 2015<br>[2]         | Denmark           | Randomized<br>controlled trial,<br>n=141                                                 | Back or upper<br>body<br>musculoskeletal<br>pain                         | Sex: 50% female<br>Age: 45 years       | Both employed and<br>non-employed<br>participants; Sick-<br>listed citizens from<br>municipality settings<br>based on public<br>compensation system | Outcome<br>evaluation                                                        |
| Andersen, 2016<br>[3]         | Denmark           | Randomized<br>controlled trial,<br>n=141                                                 | Back or upper<br>body<br>musculoskeletal<br>pain                         | Sex: not specified<br>Age: 45 years    | Both employed and<br>non-employed; Sick-<br>listed citizens from<br>municipality settings<br>based on public<br>compensation system                 | Outcome<br>evaluation                                                        |
| Bachmair, 2022<br>[4]         | United<br>Kingdom | Randomized<br>controlled trial,<br>n=367                                                 | Inflammatory<br>rheumatic<br>diseases (e.g.,<br>rheumatoid<br>arthritis) | Sex: 69% female<br>Age: 59 years       | Half of participants<br>employed with the<br>other half either<br>retired or unemployed                                                             | Outcome<br>evaluation                                                        |
| Bailey, 2020 [5]              | United<br>States  | Longitudinal<br>observational cohort<br>study, n=10,264                                  | Chronic (>12<br>weeks) knee and<br>low back pain                         | Sex: 50% female<br>Age: 44 years       | Participants were<br>employees from 30<br>companies with<br>diverse job types (e.g.,                                                                | Process and<br>outcome evaluation                                            |

Self-management interventions for work participation in patients with musculoskeletal disorders: a scoping review

| <b>First author,<br/>date</b> | <b>Country</b> | <b>Study design,<br/>sample size</b>                                      | <b>Type of MSD<sup>a</sup></b>                                                                                   | <b>Population:<br/>Sex, Age (mean)</b>                      | <b>Work status</b>                                                                                                                                              | <b>Type of study:<br/>Views, process or<br/>outcome evaluation<br/>study</b> |
|-------------------------------|----------------|---------------------------------------------------------------------------|------------------------------------------------------------------------------------------------------------------|-------------------------------------------------------------|-----------------------------------------------------------------------------------------------------------------------------------------------------------------|------------------------------------------------------------------------------|
|                               |                |                                                                           |                                                                                                                  |                                                             | manual labors, office workers, etc.)                                                                                                                            |                                                                              |
| Battista, 2025<br>[6]         | United Kingdom | Qualitative process evaluation within a randomized controlled trial, n=62 | Inflammatory arthritis                                                                                           | Sex: 82% female<br>Age: 51 years                            | All participants were employed at least 15 hours/week with moderate to high risk of work instability                                                            | Views and process                                                            |
| Calner, 2017<br>[7]           | Sweden         | Randomized controlled trial, n=99                                         | Chronic (>3 months) musculoskeletal pain from the back, neck, and shoulders, and/or a generalized pain condition | Sex: 86% female<br>Age: 44 years                            | Majority of participants (82%) were employed with 44% on sick leave; Participants with high risk of prolonged work disability                                   | Outcome evaluation                                                           |
| Dunleavy, 2022<br>[8]         | United States  | Within-subject (pre-experimental) time-control feasibility study          | Chronic (>3 months) low back pain                                                                                | Sex:<br>Predominantly male (not specified)<br>Age: 34 years | Full-time commercial clam farmers                                                                                                                               | Process and outcome evaluation                                               |
| Erwin, 2022<br>[9]            | United Kingdom | Qualitative service evaluation using a phenomenological approach, n=25    | Chronic knee, hip and/or back pain                                                                               | Sex: 75% female<br>Age: 30-69 years (mean not available)    | All participants were employed by small and medium-sized enterprises and large organizations across different sectors (e.g., healthcare, tourism, construction) | Views and process                                                            |

Self-management interventions for work participation in patients with musculoskeletal disorders: a scoping review

| <b>First author, date</b> | <b>Country</b> | <b>Study design, sample size</b>                                    | <b>Type of MSD<sup>a</sup></b>                              | <b>Population:<br/>Sex, Age (mean)</b> | <b>Work status</b>                                                                                                                         | <b>Type of study:<br/>Views, process or outcome evaluation study</b> |
|---------------------------|----------------|---------------------------------------------------------------------|-------------------------------------------------------------|----------------------------------------|--------------------------------------------------------------------------------------------------------------------------------------------|----------------------------------------------------------------------|
| Geraghty, 2024 [10]       | United Kingdom | Randomized controlled trial, n=825                                  | Low back pain with or without sciatica                      | Sex: 56% female<br>Age: 54 years       | Majority of participants were employed full or part-time                                                                                   | Outcome evaluation                                                   |
| Hoving, 2014 [11]         | Netherlands    | Prospective cohort feasibility study (pre-post), n=23               | Rheumatoid arthritis                                        | Sex: 78% female<br>Age: 48 years       | All participants were employed in various types of work (administrative, healthcare, etc.)                                                 | Process and outcome evaluation                                       |
| Hurley, 202 [12]          | United Kingdom | Prospective cohort feasibility study with service evaluation, n=481 | Chronic knee, hip and/or back pain                          | Sex: 74% female<br>Age: 49 years       | All participants were employed from public organization and small/medium enterprises with various types of work (sedentary, manual/active) | Process and outcome evaluation                                       |
| Hutting, 2015a [13]       | Netherlands    | Development study using intervention mapping, n=32                  | Non-specific complaints of the arm, neck or shoulder (CANS) | Not described                          | Employees with CANS in various sectors; clinicians working with CANS patients                                                              | Views                                                                |
| Hutting, 2015b [14]       | Netherlands    | Randomized control trial, n=123                                     | Non-specific complaints of the arm, neck or shoulder (CANS) | Sex: 83% female<br>Age: 46 years       | All participants were employed with mixed type of work from healthcare and academia                                                        | Outcome evaluation                                                   |
| Hutting, 2017 [15]        | Netherlands    | Mixed method study with qualitative                                 | Non-specific complaints of                                  | Sex: 84% female<br>Age: 46 years       | All participants were employed with mixed                                                                                                  | Views and process                                                    |



Self-management interventions for work participation in patients with musculoskeletal disorders: a scoping review

| <b>First author, date</b> | <b>Country</b> | <b>Study design, sample size</b>                                                           | <b>Type of MSD<sup>a</sup></b>    | <b>Population:<br/>Sex, Age (mean)</b>                                                                                       | <b>Work status</b>                                                                                                                                                   | <b>Type of study:<br/>Views, process or outcome evaluation study</b> |
|---------------------------|----------------|--------------------------------------------------------------------------------------------|-----------------------------------|------------------------------------------------------------------------------------------------------------------------------|----------------------------------------------------------------------------------------------------------------------------------------------------------------------|----------------------------------------------------------------------|
|                           |                | interviews (n=31) and quantitative questionnaires (n=53)                                   | the arm, neck or shoulder (CANS)  | (interview participants)                                                                                                     | type of work from healthcare and academia                                                                                                                            |                                                                      |
| Irvine, 2017 [16]         | United States  | Randomized control trial, n=597                                                            | Non-specific low back pain        | Sex: 59% female<br>Age: between 18-65 years                                                                                  | All participants were employed in various types of work (62% sitters, 25% standers, 11% lifters, 1% drivers)                                                         | Views, process and outcome evaluation                                |
| Johnston, 2014 [17]       | Australia      | Development and evaluation study using mixed methods, n=25 (n=8 patients; n=17 clinicians) | Chronic musculoskeletal disorders | Work-disabled individuals:<br>Sex: 75% male<br>Age: 26-62 years<br><br>Clinicians:<br>Sex: Not specified<br>Age: 26-70 years | Patients were all employed but sick-listed due to their musculoskeletal disorders; Clinicians were vocational rehabilitation professionals and intervention trainers | Views and process                                                    |
| Jönsson, 2019 [18]        | Sweden         | Prospective registry-based cohort study (pre-post), n=44,634                               | Knee and/or hip osteoarthritis    | Sex: 69% female<br>Age: 66 years                                                                                             | All participants were employed with up to 20% on sick leave at baseline with mixed type of work                                                                      | Outcome evaluation                                                   |
| Kongstad, 2024 [19]       | Denmark        | Secondary health-economic analysis of a randomized                                         | Non-specific low back pain        | Sex: 55% female<br>Age: 50 years                                                                                             | Most participants were of working age with mixed type of work; Societal                                                                                              | Outcome evaluation                                                   |

Self-management interventions for work participation in patients with musculoskeletal disorders: a scoping review

| <b>First author,<br/>date</b> | <b>Country</b>    | <b>Study design,<br/>sample size</b>                                                         | <b>Type of MSD<sup>a</sup></b>                                                                | <b>Population:<br/>Sex, Age (mean)</b> | <b>Work status</b>                                                                                                                  | <b>Type of study:<br/>Views, process or<br/>outcome evaluation<br/>study</b> |
|-------------------------------|-------------------|----------------------------------------------------------------------------------------------|-----------------------------------------------------------------------------------------------|----------------------------------------|-------------------------------------------------------------------------------------------------------------------------------------|------------------------------------------------------------------------------|
|                               |                   | controlled trial,<br>n=297                                                                   |                                                                                               |                                        | perspective analysis<br>included long-term<br>sickness absence ( $\geq 4$<br>weeks)                                                 |                                                                              |
| Lacaille, 2008<br>[20]        | Canada            | Pre-experimental<br>(pre-post) pilot<br>study, n=19                                          | Inflammatory<br>arthritis (e.g.,<br>rheumatoid<br>arthritis,<br>psoriatic<br>arthritis, etc.) | Sex: 100% female<br>Age: 51 years      | All participants were<br>employed with varied<br>occupations (office-<br>based, health care)                                        | Process and<br>outcome evaluation                                            |
| Linton, 2005<br>[21]          | Sweden            | Randomized<br>controlled trial,<br>n=158                                                     | Nonspecific<br>back or neck<br>pain (acute or<br>subacute)                                    | Sex: 85% female<br>Age: 48 years       | All participants were<br>employed with mixed<br>types of work                                                                       | Outcome<br>evaluation                                                        |
| Longtin, 2020<br>[22]         | Canada            | Qualitative study<br>involving qualitative<br>surveys and focus<br>group, n=11<br>clinicians | Chronic low<br>back pain                                                                      | Sex: 73%<br>Age: 41 years              | Intervention<br>specifically aimed at<br>workers with chronic<br>and disabling low<br>back pain struggling<br>to stay at work       | Process                                                                      |
| Manning, 2015<br>[23]         | United<br>Kingdom | Economic evaluation<br>alongside a<br>randomized<br>controlled trial,<br>n=108               | Rheumatoid<br>arthritis                                                                       | Sex: 76% female<br>Age: 55 years       | All participants were<br>employed or on sick<br>leave; Societal cost<br>analysis included<br>productivity costs and<br>work absence | Outcome<br>evaluation                                                        |
| Marins, 2025<br>[24]          | Brazil            | Randomized<br>controlled trial, n=47                                                         | Chronic non-<br>specific low<br>back pain                                                     | Sex: 81% male<br>Age: 39 years         | All participants were<br>public safety workers                                                                                      | Outcome<br>evaluation                                                        |

Self-management interventions for work participation in patients with musculoskeletal disorders: a scoping review

| <b>First author,<br/>date</b>             | <b>Country</b>        | <b>Study design,<br/>sample size</b>                                        | <b>Type of MSD<sup>a</sup></b>                                 | <b>Population:<br/>Sex, Age (mean)</b> | <b>Work status</b>                                                                                                                 | <b>Type of study:<br/>Views, process or<br/>outcome evaluation<br/>study</b> |
|-------------------------------------------|-----------------------|-----------------------------------------------------------------------------|----------------------------------------------------------------|----------------------------------------|------------------------------------------------------------------------------------------------------------------------------------|------------------------------------------------------------------------------|
|                                           |                       |                                                                             |                                                                |                                        | (police officers and<br>firefighters)                                                                                              |                                                                              |
| Markus, 2022<br>[25]                      | Germany               | Prospective cohort<br>study with<br>propensity-score<br>matching, n=720     | Chronic<br>musculoskeletal<br>disorders<br>(90% back pain)     | Sex: 74% female<br>Age: 54 years       | Majority of<br>participants were<br>employed and<br>involved with the<br>German federal<br>pension insurance<br>system             | Outcome<br>evaluation                                                        |
| Östlind, 2022<br>[26]                     | Sweden                | Cluster-randomized<br>controlled trial,<br>n=160                            | Hip and/or knee<br>osteoarthritis                              | Sex: 83% female<br>Age: 56 years       | All participants were<br>employed with<br>various work types<br>(51-58% sedentary<br>work, 12-19%<br>physically demanding<br>work) | Outcome<br>evaluation                                                        |
| Rasmussen,<br>2024 [27]                   | Denmark<br>and Norway | Secondary analysis<br>of a randomized<br>controlled trial,<br>n=346         | Non-specific<br>low back pain                                  | Sex: 52% female<br>Age: 45 years       | All participants were<br>employed with type of<br>work stratified by<br>physical work<br>demands for analysis.                     | Outcome<br>evaluation                                                        |
| Rodríguez<br>Sánchez-Laulhé,<br>2022 [28] | Spain                 | Randomized<br>controlled trial, n=36                                        | Rheumatoid<br>arthritis of the<br>hands, wrists, or<br>fingers | Sex: 61% female<br>Age: 59 years       | Not specified                                                                                                                      | Outcome<br>evaluation                                                        |
| Sheppard, 2015<br>[29]                    | Australia             | Process evaluation<br>of a feasibility study<br>with mixed methods,<br>n=16 | Chronic<br>musculoskeletal<br>disorders                        | Sex: 50% female<br>Age: 46 years       | All participants were<br>employed and<br>receiving<br>compensation benefits                                                        | Views and process                                                            |

Self-management interventions for work participation in patients with musculoskeletal disorders: a scoping review

| <b>First author,<br/>date</b> | <b>Country</b>   | <b>Study design,<br/>sample size</b> | <b>Type of MSD<sup>a</sup></b>           | <b>Population:<br/>Sex, Age (mean)</b> | <b>Work status</b>                                                                                                                             | <b>Type of study:<br/>Views, process or<br/>outcome evaluation<br/>study</b> |
|-------------------------------|------------------|--------------------------------------|------------------------------------------|----------------------------------------|------------------------------------------------------------------------------------------------------------------------------------------------|------------------------------------------------------------------------------|
|                               |                  |                                      |                                          |                                        | due to their<br>musculoskeletal<br>disorders                                                                                                   |                                                                              |
| Slater, 2009 [30]             | United<br>States | Randomized<br>controlled trial, n=67 | First-onset<br>subacute low<br>back pain | Sex: 87% male<br>Age: 30 years         | All participants were<br>employed as active-<br>duty personnel and<br>assigned to light duty<br>at baseline                                    | Process and<br>outcome evaluation                                            |
| Tran, 2023 [31]               | Australia        | Randomized<br>controlled trial, n=49 | Lateral elbow<br>tendinopathy            | Sex: 47% male<br>Age: 47 years         | All participants were<br>injured workers with<br>approved<br>compensation claims<br>with a majority of<br>manual workers in<br>various sectors | Outcome<br>evaluation                                                        |

<sup>a</sup>MSD:musculoskeletal disorders

## References

1. Andersen LN, Kohberg M, Herborg LG, Sogaard K, Roessler KK (2014) “Here we’re all in the same boat” - a qualitative study of group based rehabilitation for sick-listed citizens with chronic pain. *Scandinavian Journal of Psychology* 55:333–342
2. Andersen LN, Juul-Kristensen B, Sørensen TL, Herborg LG, Roessler KK, Sogaard K (2015) Efficacy of Tailored Physical Activity or Chronic Pain Self-Management Programme on return to work for sick-listed citizens: A 3-month randomised controlled trial. *Scandinavian journal of public health* 43:694–703
3. Andersen LN, Juul-Kristensen B, Sørensen TL, Herborg LG, Roessler KK, Sogaard K (2016) Longer term follow-up on effects of Tailored Physical Activity or Chronic Pain Self-Management Programme on return-to-work: A randomized controlled trial. *Journal of rehabilitation medicine* 48:887–892
4. Bachmair E-M, Martin K, Aucott L, et al (2022) Remotely delivered cognitive behavioural and personalised exercise interventions for fatigue severity and impact in inflammatory rheumatic diseases (LIFT): a multicentre, randomised, controlled, open-label, parallel-group trial. *The Lancet Rheumatology* 4:e534–e545
5. Bailey JF, Agarwal V, Zheng P, Smuck M, Fredericson M, Kennedy DJ, Krauss J (2020) Digital Care for Chronic Musculoskeletal Pain: 10,000 Participant Longitudinal Cohort Study. *J Med Internet Res* 22:e18250
6. Battista S, Parker J, Ching A, et al (2025) WORKWELL process evaluation: qualitative data analyses of the participant interviews at 12- and 36-month follow-ups. *Rheumatology Advances in Practice* 9:rkaf034
7. Calner T, Nordin C, Eriksson MK, Nyberg L, Gard G, Michaelson P (2017) Effects of a self-guided, web-based activity programme for patients with persistent musculoskeletal pain in primary healthcare: A randomized controlled trial. *European Journal of Pain* 21:1110–1120
8. Dunleavy K, Kane A, Coffman A, Reidy J, Bishop MD (2022) Outcomes of Participatory Ergonomics and Self-management in Commercial Clam Farmers with Chronic Low Back Pain: A Feasibility Study. *Journal of agromedicine* 27:217–231
9. Erwin J, Irwin S, Hallett R, Woolf A, Carter A, Hurley MV (2022) Participants experience of the Joint Pain Advice in the workplace programme. *Musculoskeletal Care* 20:214–225
10. Geraghty AWA, Becque T, Roberts LC, et al (2024) Supporting self-management of low back pain with an internet intervention with and without telephone support in primary care (SupportBack 2): a randomised controlled trial of clinical and cost-effectiveness. *The Lancet Rheumatology*. [https://doi.org/10.1016/S2665-9913\(24\)00086-9](https://doi.org/10.1016/S2665-9913(24)00086-9)
11. Hoving JL, Zoer I, Van Der Meer M, Van Der Straaten Y, Logtenberg-Rutten C, Kraak-Put S, De Vries N, Tak P, Sluiter JK, Frings-Dresen M (2014) E-health to improve work

Self-management interventions for work participation in patients with musculoskeletal disorders: a scoping review

- functioning in employees with rheumatoid arthritis in rheumatology practice: A feasibility study. *Scandinavian Journal of Rheumatology* 43:481–487
12. Hurley MV, Irwin S, Erwin J, Gibney A, Hallett R, Carter A, Woolf A (2021) Delivering NICE Joint Pain Advice in the workplace. *Musculoskeletal Care* 19:555–563
  13. Hutting N, Detaille SI, Engels JA, Heerkens YF, Staal JB, Nijhuis-van Der Sanden MW (2015) Development of a self-management program for employees with complaints of the arm, neck, and/or shoulder: an intervention mapping approach. *JMDH* 307
  14. Hutting N, Staal JB, Engels JA, Heerkens YF, Detaille SI, Nijhuis-van der Sanden MWG (2015) Effect evaluation of a self-management programme for employees with complaints of the arm, neck or shoulder: a randomised controlled trial. *Occupational and environmental medicine* 72:852–861
  15. Hutting N, Detaille S, Heerkens Y, Engels J, Staal J, Nijhuis-van der Sanden M (2017) Experiences of Participants in a Self-Management Program for Employees with Complaints of the Arm, Neck or Shoulder (CANS): A Mixed Methods Study. *Journal of Occupational Rehabilitation* 27:35–48
  16. Irvine AB, Russell H, Manocchia M, Mino DE, Glassen TC, Morgan R, Gau JM, Birney AJ, Ary DV (2015) Mobile-web app to self-manage low back pain: Randomized controlled trial. *Journal of Medical Internet Research* 17:e1–e1
  17. Johnston V, Strong J, Gargett S, Jull G, Ellis N (2014) Enhancing the vocational outcomes of people with chronic disabilities caused by a musculoskeletal condition: Development and evaluation of content of self-management training modules. *Work* 49:455–464
  18. Jönsson T, Eek F, Dell’Isola A, Dahlberg LE, Ekvall Hansson E (2019) The Better Management of Patients with Osteoarthritis Program: Outcomes after evidence-based education and exercise delivered nationwide in Sweden. *PLoS ONE* 14:e0222657
  19. Kongstad LP, Øverås CK, Skovsgaard CV, Sandal LF, Hartvigsen J, Søgaard K, Mork PJ, Stochkendahl MJ (2024) Cost-effectiveness analysis of app-delivered self-management support (selfBACK) in addition to usual care for people with low back pain in Denmark. *BMJ open* 14:e086800
  20. Lacaille D, White MA, Rogers PA, Backman CL, Gignac MAM, Esdaile JM (2008) A proof-of-concept study of the “Employment and Arthritis: Making it Work” program. *Arthritis Care and Research* 59:1647–1655
  21. Linton SJ, Boersma K, Jansson M, Sv rd L, Botvalde M (2005) The Effects of Cognitive-Behavioral and Physical Therapy Preventive Interventions on Pain-Related Sick Leave: A Randomized Controlled Trial. *The Clinical Journal of Pain* 21:109–119
  22. Longtin C, Tousignant-Laflamme Y, Coutu M-F (2020) A logic model for a self-management program designed to help workers with persistent and disabling low back pain stay at work. *Work* 67:395–406

Self-management interventions for work participation in patients with musculoskeletal disorders: a scoping review

23. Manning VL, Kaambwa B, Ratcliffe J, Scott DL, Choy E, Hurley MV, Bearne LM (2015) Economic evaluation of a brief Education, Self-management and Upper Limb Exercise Training in People with Rheumatoid Arthritis (EXTRA) programme: a trial-based analysis. *Rheumatology* 54:302–309
24. Marins EF, Primo TT, Vasconcelos BB, et al (2025) Effectiveness of an app-delivered, self-management exercise program in public safety workers with chronic low back pain: a randomized controlled trial. *Brazilian Journal of Physical Therapy* 29:101232
25. Markus M, Euhus A, Bethge M (2022) Effectiveness of behavioural medical rehabilitation under real-life conditions in Germany: A propensity-score matched analysis. *Journal of rehabilitation medicine* 54:jrm00248
26. Östlind E, Eek F, Stigmar K, Sant’Anna A, Hansson EE (2022) Promoting work ability with a wearable activity tracker in working age individuals with hip and/or knee osteoarthritis: a randomized controlled trial. *BMC Musculoskeletal Disorders* 23:1–10
27. Rasmussen CDN, Sandal LF, Holtermann A, Stochkendahl MJ, Mork PJ, Sogaard K (2024) Effect of a smartphone self-management digital support system for low-back pain (selfBACK) among workers with high physical work demands – secondary analysis of a randomized controlled trial. *Scand J Work Environ Health* 50:613–621
28. Rodríguez Sánchez-Laulhé P, Luque-Romero L, Barrero-García F, Biscarri-Carbonero Á, Blanquero J, Suero-Pineda A, Heredia-Rizo A (2022) An Exercise and Educational and Self-management Program Delivered With a Smartphone App (CareHand) in Adults With Rheumatoid Arthritis of the Hands: randomized Controlled Trial. 10:e35462
29. Sheppard D, Gargett S, MacKenzie A, Jull G, Johnston V, Strong J, Battersby M, Ellis N (2015) Implementing a Self-Management Intervention for People with a Chronic Compensable Musculoskeletal Injury in a Workers Compensation Context: A Process Evaluation. *Journal of Occupational Rehabilitation* 25:412–422
30. Slater MA, Weickgenant AL, Greenberg MA, et al (2009) Preventing Progression to Chronicity in First Onset, Subacute Low Back Pain: An Exploratory Study. *Archives of Physical Medicine and Rehabilitation* 90:545–552
31. Tran T, Harris C, Ciccarelli M (2023) The impact of a hand therapy workplace-based educational approach on the management of lateral elbow tendinopathy: A randomized controlled study. *Journal of Hand Therapy* 36:45–59

# Self-management interventions for work participation in patients with musculoskeletal disorders: a scoping review

## Appendix 6. General constructs assessed in each outcome evaluation study (n=23)

| Constructs                    | Study |   |   |   |   |   |   |   |   |    |    |    |    |    |    |    |    |    |    |    |    |    |    |
|-------------------------------|-------|---|---|---|---|---|---|---|---|----|----|----|----|----|----|----|----|----|----|----|----|----|----|
|                               | 1     | 2 | 3 | 4 | 5 | 6 | 7 | 8 | 9 | 10 | 11 | 12 | 13 | 14 | 15 | 16 | 17 | 18 | 19 | 20 | 21 | 22 | 23 |
| Disability and function       |       |   |   |   |   |   |   |   |   |    |    |    |    |    |    |    |    |    |    |    |    |    |    |
| Pain intensity                |       |   |   |   |   |   |   |   |   |    |    |    |    |    |    |    |    |    |    |    |    |    |    |
| Quality of life               |       |   |   |   |   |   |   |   |   |    |    |    |    |    |    |    |    |    |    |    |    |    |    |
| Self-efficacy                 |       |   |   |   |   |   |   |   |   |    |    |    |    |    |    |    |    |    |    |    |    |    |    |
| Anxiety and/or depression     |       |   |   |   |   |   |   |   |   |    |    |    |    |    |    |    |    |    |    |    |    |    |    |
| Performance measures          |       |   |   |   |   |   |   |   |   |    |    |    |    |    |    |    |    |    |    |    |    |    |    |
| Kinesiophobia                 |       |   |   |   |   |   |   |   |   |    |    |    |    |    |    |    |    |    |    |    |    |    |    |
| Physical activity level       |       |   |   |   |   |   |   |   |   |    |    |    |    |    |    |    |    |    |    |    |    |    |    |
| Catastrophizing               |       |   |   |   |   |   |   |   |   |    |    |    |    |    |    |    |    |    |    |    |    |    |    |
| Fatigue                       |       |   |   |   |   |   |   |   |   |    |    |    |    |    |    |    |    |    |    |    |    |    |    |
| Fear-avoidance                |       |   |   |   |   |   |   |   |   |    |    |    |    |    |    |    |    |    |    |    |    |    |    |
| Healthcare utilization        |       |   |   |   |   |   |   |   |   |    |    |    |    |    |    |    |    |    |    |    |    |    |    |
| Cost-effectiveness            |       |   |   |   |   |   |   |   |   |    |    |    |    |    |    |    |    |    |    |    |    |    |    |
| Confidence to self-manage     |       |   |   |   |   |   |   |   |   |    |    |    |    |    |    |    |    |    |    |    |    |    |    |
| Knowledge, beliefs, attitudes |       |   |   |   |   |   |   |   |   |    |    |    |    |    |    |    |    |    |    |    |    |    |    |
| Sleep                         |       |   |   |   |   |   |   |   |   |    |    |    |    |    |    |    |    |    |    |    |    |    |    |
| Likelihood of surgery         |       |   |   |   |   |   |   |   |   |    |    |    |    |    |    |    |    |    |    |    |    |    |    |
| Body mass index               |       |   |   |   |   |   |   |   |   |    |    |    |    |    |    |    |    |    |    |    |    |    |    |
| Satisfaction with care        |       |   |   |   |   |   |   |   |   |    |    |    |    |    |    |    |    |    |    |    |    |    |    |
| Morning stiffness             |       |   |   |   |   |   |   |   |   |    |    |    |    |    |    |    |    |    |    |    |    |    |    |
| Coping                        |       |   |   |   |   |   |   |   |   |    |    |    |    |    |    |    |    |    |    |    |    |    |    |
| Patient activation            |       |   |   |   |   |   |   |   |   |    |    |    |    |    |    |    |    |    |    |    |    |    |    |
| Patient enablement            |       |   |   |   |   |   |   |   |   |    |    |    |    |    |    |    |    |    |    |    |    |    |    |
| Prevention-helping behaviors  |       |   |   |   |   |   |   |   |   |    |    |    |    |    |    |    |    |    |    |    |    |    |    |
| Risk of prolonged disability  |       |   |   |   |   |   |   |   |   |    |    |    |    |    |    |    |    |    |    |    |    |    |    |

Yes

No

No. of studies (%)

Study, Year

16 (70)

1. Andersen et al., 2014

16 (70)

2. Andersen et al., 2016

9 (39)

3. Bachmair et al., 2022

8 (35)

4. Bailey et al., 2020

7 (30)

5. Calner et al., 2017

5 (22)

6. Dunleavy et al., 2022

4 (17)

7. Geraghty et al., 2024

4 (17)

8. Hoving et al., 2014

4 (17)

9. Hurley et al., 2021

3 (13)

10. Hutting et al., 2015a

3 (13)

11. Irvine et al., 2017

3 (13)

12. Jönsson et al., 2019

3 (13)

13. Kongstad et al., 2024

3 (13)

14. Lacaille et al., 2008

3 (13)

15. Linton et al., 2005

3 (13)

16. Manning et al., 2015

2 (9)

17. Marins et al., 2025

2 (9)

18. Markus et al., 2022

2 (9)

19. Östlund et al., 2022

2 (9)

20. Rasmussen et al., 2024

2 (9)

21. Sánchez-Laulhé et al., 2022

1 (4)

22. Slater et al., 2009

1 (4)

23. Tran et al., 2023



Self-management interventions for work participation in patients with musculoskeletal disorders: a scoping review

## Appendix 7. Detailed impact evaluation methods of self-management interventions by type of study (n=31 studies)

### View studies (n=8)

| Construct assessed (n) <sup>a</sup> | Evaluation methods (n)                                                                                                                                                                                                                                                                                                                                       |
|-------------------------------------|--------------------------------------------------------------------------------------------------------------------------------------------------------------------------------------------------------------------------------------------------------------------------------------------------------------------------------------------------------------|
| Perspectives (n=4)                  | Participants' general perspectives about the impact of the intervention: <ul style="list-style-type: none"> <li>- Semi-structured individual interviews (n=2)</li> </ul> Participants' perspectives of potential improvements: <ul style="list-style-type: none"> <li>- Semi-structured individual interviews (n=2)</li> <li>- Focus groups (n=1)</li> </ul> |
| Experiences (n=3)                   | Participants' experiences following participation in the intervention: <ul style="list-style-type: none"> <li>- Semi-structured individual interviews (n=4)</li> <li>- Focus groups (n=2)</li> </ul>                                                                                                                                                         |
| Needs (n=2)                         | Injured workers' reported needs to stay at work: <ul style="list-style-type: none"> <li>- Focus groups (n=2)</li> <li>- Open-ended survey questions (n=1)</li> </ul> Injured workers' reported needs to return to work: <ul style="list-style-type: none"> <li>- Focus group (n=1)</li> <li>- Open-ended survey questions (n=1)</li> </ul>                   |
| Understandings (n=1)                | Understanding of the intervention content: <ul style="list-style-type: none"> <li>- Self-reported via a 7-item custom survey (n=1)</li> </ul>                                                                                                                                                                                                                |

<sup>a</sup>n indicates the number of studies that reported the construct (left column) or used the corresponding evaluation method (right column)

### Process studies (n=14)

| Construct assessed (n) <sup>a</sup> | Evaluation methods (n)                                                                                                                                                                                                                                                                                                                                                                                                                                                                                                                                                                                                                                                                                             |
|-------------------------------------|--------------------------------------------------------------------------------------------------------------------------------------------------------------------------------------------------------------------------------------------------------------------------------------------------------------------------------------------------------------------------------------------------------------------------------------------------------------------------------------------------------------------------------------------------------------------------------------------------------------------------------------------------------------------------------------------------------------------|
| Acceptability (n=11)                | Satisfaction: <ul style="list-style-type: none"> <li>- Self-reported user satisfaction via custom survey (n=3)</li> <li>- Self-reported intervention satisfaction via a single custom item (n=2)</li> <li>- Semi-structured individual interviews (n=1)</li> </ul> Perceived benefits: <ul style="list-style-type: none"> <li>- Open-ended survey question (n=1)</li> </ul> Intervention coherence: <ul style="list-style-type: none"> <li>- Semi-structured individual interviews (n=1)</li> <li>- Focus groups (n=2)</li> <li>- Open-ended survey questions (n=2)</li> </ul> Intervention credibility: <ul style="list-style-type: none"> <li>- Self-reported via a custom 6-item questionnaire (n=1)</li> </ul> |
| Accessibility (n=1)                 | Accessibility of the intervention:                                                                                                                                                                                                                                                                                                                                                                                                                                                                                                                                                                                                                                                                                 |

Self-management interventions for work participation in patients with musculoskeletal disorders:  
a scoping review

|                                   |                                                                                                                                                                                                                                                                                                                                                                                                                                                                                                                                                                                                                                                                                                                                                                                                                                                                                                                                                                                                |
|-----------------------------------|------------------------------------------------------------------------------------------------------------------------------------------------------------------------------------------------------------------------------------------------------------------------------------------------------------------------------------------------------------------------------------------------------------------------------------------------------------------------------------------------------------------------------------------------------------------------------------------------------------------------------------------------------------------------------------------------------------------------------------------------------------------------------------------------------------------------------------------------------------------------------------------------------------------------------------------------------------------------------------------------|
|                                   | <ul style="list-style-type: none"> <li>- Semi-structured individual interviews (n=1)</li> <li>- Focus groups (n=1)</li> </ul>                                                                                                                                                                                                                                                                                                                                                                                                                                                                                                                                                                                                                                                                                                                                                                                                                                                                  |
| Appropriateness (n=5)             | <p>Relevance and suitability of the intervention content:</p> <ul style="list-style-type: none"> <li>- Focus groups (n=2)</li> <li>- Open-ended survey questions (n=2)</li> <li>- Semi-structured individual interviews (n=1)</li> </ul> <p>Usefulness of the intervention:</p> <ul style="list-style-type: none"> <li>- Self-reported via single custom item (n=1)</li> <li>- Focus groups (n=2)</li> <li>- Open-ended survey questions (n=2)</li> </ul>                                                                                                                                                                                                                                                                                                                                                                                                                                                                                                                                      |
| Implementation and delivery (n=8) | <p>Intervention (website) usability:</p> <ul style="list-style-type: none"> <li>- System Usability Scale (n=1)</li> </ul> <p>Engagement with intervention:</p> <ul style="list-style-type: none"> <li>- Engagement level via system-recorded data (n=2)</li> <li>- Completion rate and attendance via system-recorded data (n=4)</li> <li>- Self-reported engagement with the intervention via single custom item (n=3)</li> </ul> <p>Implementation of SM strategies (delivery and adoption):</p> <ul style="list-style-type: none"> <li>- Self-reported use of SM strategies via a single custom item (n=2)</li> <li>- Self-reported ease of implementation of strategies via a single custom item (n=1)</li> <li>- Self-reported job accommodations made via single custom item (n=1)</li> <li>- Semi-structured individual interviews (n=1)</li> </ul> <p>Recruitment rate and attrition (feasibility):</p> <ul style="list-style-type: none"> <li>- Research project log (n=1)</li> </ul> |

<sup>a</sup>n indicates the number of studies that reported the construct (left column) or used the corresponding evaluation method (right column)

## Outcome evaluation studies (n=23)

### Work-related outcomes

| Construct assessed (n) <sup>a</sup> | Evaluation methods/instrument measures (n)                                                                                                                                                                                                                                                                           |
|-------------------------------------|----------------------------------------------------------------------------------------------------------------------------------------------------------------------------------------------------------------------------------------------------------------------------------------------------------------------|
| Work ability (n=10)                 | <ul style="list-style-type: none"> <li>- Work Ability Index (n=7)</li> <li>- Self-reported working percentage (n=1)</li> <li>- Self-reported, custom item (n=2)</li> <li>- Employment days via administrative data (n=1)</li> <li>- Michigan Hand Outcome Questionnaire – work performance subscale (n=1)</li> </ul> |

## Self-management interventions for work participation in patients with musculoskeletal disorders: a scoping review

|                                                  |                                                                                                                                                                                                                                                                                                                                                                                                                 |
|--------------------------------------------------|-----------------------------------------------------------------------------------------------------------------------------------------------------------------------------------------------------------------------------------------------------------------------------------------------------------------------------------------------------------------------------------------------------------------|
| Sick leave, absenteeism and return to work (n=9) | <ul style="list-style-type: none"> <li>- Register-based data on days of sick leave (n=2)</li> <li>- Stable RTW (4 weeks) via administrative data (n=1)</li> <li>- Time to return to work, self-reported (n=1)</li> <li>- Self-reported days of sick leave (n=6)</li> </ul>                                                                                                                                      |
| Work disability (n=7)                            | <ul style="list-style-type: none"> <li>- Work Limitations Questionnaire (n=3)</li> <li>- Patient Specific Functional Scale work task only (n=2)</li> <li>- Musculoskeletal Health Questionnaire single item on work (n=1)</li> <li>- Disabilities of the Arm, Shoulder and Hand questionnaire – work module (n=1)</li> <li>- Self-reported custom item (n=1)</li> <li>- Work Instability Scale (n=2)</li> </ul> |
| Work productivity (n=5)                          | <ul style="list-style-type: none"> <li>- Work Productivity and Activity Impairment (WPAI) (n=4)</li> <li>- Productivity loss – sickness absence multiplied by average national gross wage (n=1)</li> <li>- Endicott Work Productivity Scale (n=1)</li> </ul>                                                                                                                                                    |
| Presenteeism (n=3)                               | <ul style="list-style-type: none"> <li>- Stanford Presenteeism Scale (n=3)</li> </ul>                                                                                                                                                                                                                                                                                                                           |
| Self-efficacy and work (n=2)                     | <ul style="list-style-type: none"> <li>- Self-efficacy at work scale (n=1)</li> <li>- Self-reported via custom item (n=1)</li> </ul>                                                                                                                                                                                                                                                                            |
| Work adaptations (n=2)                           | <ul style="list-style-type: none"> <li>- Custom questionnaire/item (n=2)</li> </ul>                                                                                                                                                                                                                                                                                                                             |
| Compensation system-related data (n=1)           | <ul style="list-style-type: none"> <li>- Days with sickness absence benefits via administrative data (n=1)</li> <li>- Days with unemployment benefits via administrative data (n=1)</li> <li>- Disability pension requests via administration data (n=1)</li> </ul>                                                                                                                                             |
| Work status (n=1)                                | <ul style="list-style-type: none"> <li>- Physician ratings based on medical records (n=1)</li> </ul>                                                                                                                                                                                                                                                                                                            |
| Burnout in occupational settings (n=1)           | <ul style="list-style-type: none"> <li>- Utrecht Burnout Scale (n=1)</li> </ul>                                                                                                                                                                                                                                                                                                                                 |

<sup>a</sup>n indicates the number of studies that reported the construct (left column) or used the corresponding evaluation method/instrument measure (right column)

## General outcomes

| Construct assessed (n) <sup>a</sup> | Evaluation methods/instrument measures (n)                                                                                                                                                                                                                                                                                                                                                                                                                                           |
|-------------------------------------|--------------------------------------------------------------------------------------------------------------------------------------------------------------------------------------------------------------------------------------------------------------------------------------------------------------------------------------------------------------------------------------------------------------------------------------------------------------------------------------|
| Disability and function (n=16)      | <ul style="list-style-type: none"> <li>- Brief Pain Inventory – Interference scale (n=1)</li> <li>- Pain Disability Index (n=1)</li> <li>- Roland-Morris Disability Questionnaire (n=5)</li> <li>- Knee injury and Osteoarthritis Outcome Scale (n=1)</li> <li>- Modified von Kork scale (n=1)</li> <li>- Oswestry Disability Index (n=1)</li> <li>- Musculoskeletal Health Questionnaire (n=1)</li> <li>- Disabilities of the Arm, Shoulder and Hand questionnaire (n=2)</li> </ul> |

Self-management interventions for work participation in patients with musculoskeletal disorders:  
a scoping review

|                                 |                                                                                                                                                                                                                                                                                                                                                                                                                      |
|---------------------------------|----------------------------------------------------------------------------------------------------------------------------------------------------------------------------------------------------------------------------------------------------------------------------------------------------------------------------------------------------------------------------------------------------------------------|
|                                 | <ul style="list-style-type: none"> <li>- Health Assessment questionnaire (n=1)</li> <li>- Rheumatoid Arthritis Disease Activity Index (n=1)</li> <li>- Indicators of the Rehabilitation Status scale (n=1)</li> <li>- Chronic Pain Grade Scale (n=1)</li> <li>- Michigan Hand Outcome Questionnaire (n=1)</li> <li>- Sickness Impact Profile (n=1)</li> <li>- Patient-Rated Tennis Elbow Evaluation (n=1)</li> </ul> |
| Pain intensity (n=16)           | <ul style="list-style-type: none"> <li>- Visual analog scale (n=5)</li> <li>- Numerical rating scale (n=10)</li> <li>- Descriptor Differential Scale (n=1)</li> </ul>                                                                                                                                                                                                                                                |
| Quality of life (n=9)           | <ul style="list-style-type: none"> <li>- Dartmouth CO-OP (n=1)</li> <li>- Health-related QoL short form (n=3)</li> <li>- EQ-5D-3L (n=3)</li> <li>- WHOQOL instrument (n=1)</li> <li>- Quality of Well-Being Scale (n=1)</li> </ul>                                                                                                                                                                                   |
| Self-efficacy (n=8)             | <ul style="list-style-type: none"> <li>- Custom scale (n=1)</li> <li>- Pain Self-Efficacy Questionnaire (n=4)</li> <li>- Confidence to self-manage custom item (n=1)</li> <li>- General Self-Efficacy Scale (n=1)</li> <li>- Arthritis Self-Efficacy Scale (n=1)</li> <li>- Chronic Pain Self-Efficacy Scale (n=1)</li> </ul>                                                                                        |
| Anxiety and/or depression (n=7) | <ul style="list-style-type: none"> <li>- Hospital Anxiety and Depression Scale (n=2)</li> <li>- Patient Health Questionnaire (n=3)</li> <li>- Generalized Anxiety Disorder 7-item scale (n=1)</li> <li>- Pain Anxiety Symptom Scale (n=1)</li> <li>- Depression Anxiety Stress Scale (n=1)</li> </ul>                                                                                                                |
| Performance measures (n=5)      | <ul style="list-style-type: none"> <li>- Grip strength via dynamometer (n=4)</li> <li>- Pinch strength via pinch gauge (n=1)</li> <li>- Aerobic capacity via VO2 max testing (n=2)</li> <li>- Sit-to-stand test (n=1)</li> <li>- Maximum Voluntary Isometric Contraction (n=1)</li> <li>- Endurance tests (n=1)</li> </ul>                                                                                           |
| Kinesiophobia (n=4)             | <ul style="list-style-type: none"> <li>- Tampa Scale of Kinesiophobia (n=5)</li> </ul>                                                                                                                                                                                                                                                                                                                               |
| Physical activity level (n=4)   | <ul style="list-style-type: none"> <li>- Godin physical activity scale (n=1)</li> <li>- Self-reported via custom item (n=2)</li> <li>- International Physical Activity Questionnaire (n=1)</li> </ul>                                                                                                                                                                                                                |
| Catastrophizing (n=3)           | <ul style="list-style-type: none"> <li>- Pain catastrophizing scale (n=3)</li> </ul>                                                                                                                                                                                                                                                                                                                                 |

Self-management interventions for work participation in patients with musculoskeletal disorders: a scoping review

|                                        |                                                                                                                                                                                                                                                                                                                           |
|----------------------------------------|---------------------------------------------------------------------------------------------------------------------------------------------------------------------------------------------------------------------------------------------------------------------------------------------------------------------------|
| Fatigue (n=3)                          | <ul style="list-style-type: none"> <li>- Chalder Fatigue Scale (n=1)</li> <li>- Fatigue Severity Scale (n=1)</li> <li>- Bristol Rheumatoid Arthritis Fatigue Multidimensional Questionnaire (n=1)</li> <li>- Checklist Individual Strength (n=1)</li> <li>- Multidimensional Assessment of Fatigue scale (n=1)</li> </ul> |
| Fear-avoidance (n=3)                   | <ul style="list-style-type: none"> <li>- Custom item (n=1)</li> <li>- Fear-Avoidance Beliefs Questionnaire (n=2)</li> </ul>                                                                                                                                                                                               |
| Healthcare utilization (n=3)           | <ul style="list-style-type: none"> <li>- Self-reported general practitioner consultations (n=1)</li> <li>- Medication use (n=1)</li> <li>- Custom item (n=1)</li> </ul>                                                                                                                                                   |
| Cost-effectiveness (n=3)               | <ul style="list-style-type: none"> <li>- Cost-effectiveness analysis (n=3)</li> </ul>                                                                                                                                                                                                                                     |
| Confidence to self-manage (n=3)        | <ul style="list-style-type: none"> <li>- Self-reported custom item (n=3)</li> </ul>                                                                                                                                                                                                                                       |
| Knowledge, beliefs and attitudes (n=2) | <ul style="list-style-type: none"> <li>- Knowledge about back pain custom scale (n=1)</li> <li>- Survey of Pain Attitudes control and emotion subscales (n=1)</li> <li>- Attitudes toward self-management custom scale (n=1)</li> <li>- Pain and Impairment Relationship Scale (n=1)</li> </ul>                           |
| Sleep (n=2)                            | <ul style="list-style-type: none"> <li>- Jenkins Sleep Scale (n=1)</li> <li>- Pittsburgh Sleep Quality Index (n=1)</li> </ul>                                                                                                                                                                                             |
| Likelihood of surgery (n=2)            | <ul style="list-style-type: none"> <li>- Self-reported custom item (n=2)</li> </ul>                                                                                                                                                                                                                                       |
| Body mass index (n=2)                  | <ul style="list-style-type: none"> <li>- N/A</li> </ul>                                                                                                                                                                                                                                                                   |
| Satisfaction with care (n=1)           | <ul style="list-style-type: none"> <li>- Self-reported custom item (n=1)</li> </ul>                                                                                                                                                                                                                                       |
| Morning stiffness (n=1)                | <ul style="list-style-type: none"> <li>- Visual analog scale (n=1)</li> </ul>                                                                                                                                                                                                                                             |
| Coping (n=1)                           | <ul style="list-style-type: none"> <li>- Coping Strategy Questionnaire (n=1)</li> </ul>                                                                                                                                                                                                                                   |
| Patient activation (n=1)               | <ul style="list-style-type: none"> <li>- Patient Activation Measure (n=1)</li> </ul>                                                                                                                                                                                                                                      |
| Patient enablement (n=1):              | <ul style="list-style-type: none"> <li>- Patient Enablement Index (n=1)</li> </ul>                                                                                                                                                                                                                                        |
| Prevention-helping behaviors (n=1)     | <ul style="list-style-type: none"> <li>- Custom scale (n=1)</li> </ul>                                                                                                                                                                                                                                                    |
| Risk of prolonged disability (n=1)     | <ul style="list-style-type: none"> <li>- Start Back Screening Tool (n=1)</li> </ul>                                                                                                                                                                                                                                       |

<sup>a</sup>n indicates the number of studies that reported the construct (left column) or used the corresponding evaluation method/instrument measure (right column)
